# Supplementary material for: Low tacrolimus levels during the first week after liver transplantation are associated with an increased incidence of early acute rejection.
Source: Springer Nature journal article supplement (doi:10.1038/s41467-024-50052-2), 2001-10-01
Supplement: 41467_2024_50052_MOESM1_ESM.pdf [file 41467_2024_50052_MOESM1_ESM.pdf]

Supplementary information for:

**SARS-CoV-2 serosurvey across multiple waves of the COVID-19 pandemic in New York City between 2020-2023**

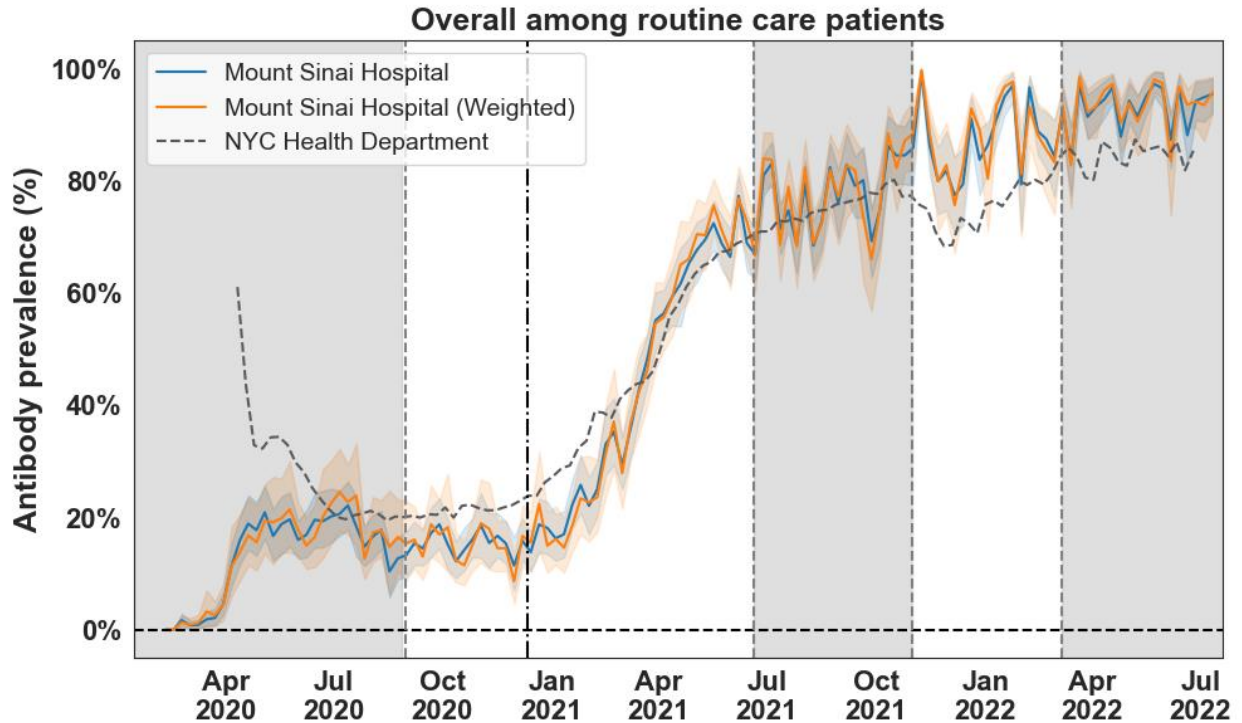

**Supplementary Figure 1.** SARS-CoV-2 mean spike binding antibody prevalence and titers in the Routine care and Urgent care groups at a Mount Sinai Hospital in New York City (NYC). Antibody prevalence in New York City reported by the NYC Department of Health and Mental Hygiene (NYC DOHMH) is represented by the dashed line. Antibody prevalence in the Routine Care group, measured between February 9<sup>th</sup> 2020 to July 18<sup>th</sup> 2022 with a 95% bootstrapped confidence interval. Weights are from Census 2022 estimates of the New York City population. Alternating shaded areas in all graphs denote the five successive epidemiological waves of infection in NYC. Grey color and vertical dashed lines serve as visual contrast.

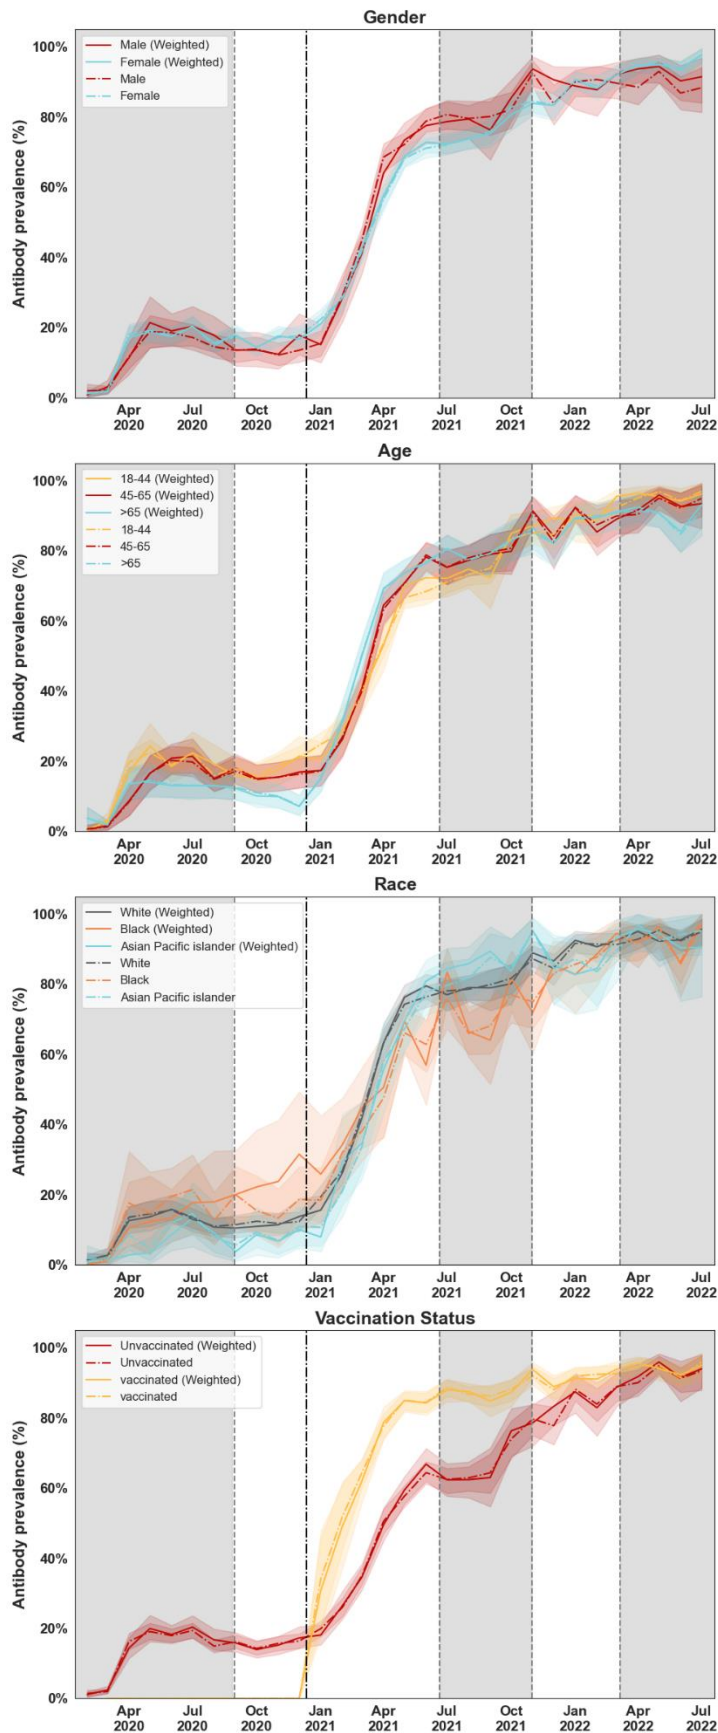

**Supplementary Figure 2.** SARS-CoV-2 spike antibody prevalence stratified by demographic groups and vaccination status. Antibody prevalence in the Routine Care groups, measured between February 9<sup>th</sup> 2020 to July 18<sup>th</sup> 2022, and stratified by gender, age, race, and vaccination status at the time of sample collection. Charts are fitted with a bootstrapped confidence interval based on random resampling of results to compute an estimate of the 95% confidence interval of the mean. Gender stratification: males, females. Categorical age levels: 18-44, 45-65, >65. Race stratification: White, Black, Asian and Pacific islander, Other, unknown. The date on which the first FDA-authorized SARS-CoV-2 vaccine became available in NYC is indicated by the vertical dotted line and syringe. Vaccination status was assessed at time of sample collection and does not reflect vaccination rates in NYC or within our patient population. Weights are from Census 2022 estimates of the New York City population. Alternating shaded areas in all graphs denote the five successive epidemiological waves of infection in NYC. Grey color and vertical dashed lines serve as visual contrast.

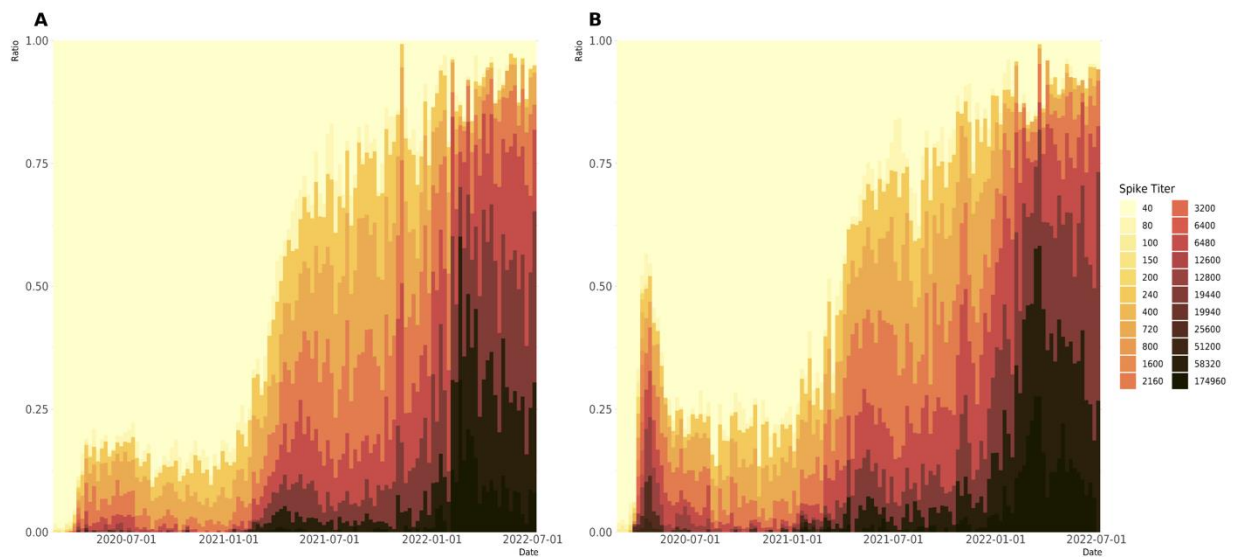

**Supplementary Figure 3. Distribution of SARS-CoV-2 spike antibody titers during the serosurvey period.** SARS-CoV-2 spike antibody titers in the Routine Care (left column), and Urgent care (right column) groups measured between February 9<sup>th</sup> 2020 to July 18<sup>th</sup> 2022. Weekly counts are presented per single column. Color gradient depicts the range of antibody titers.

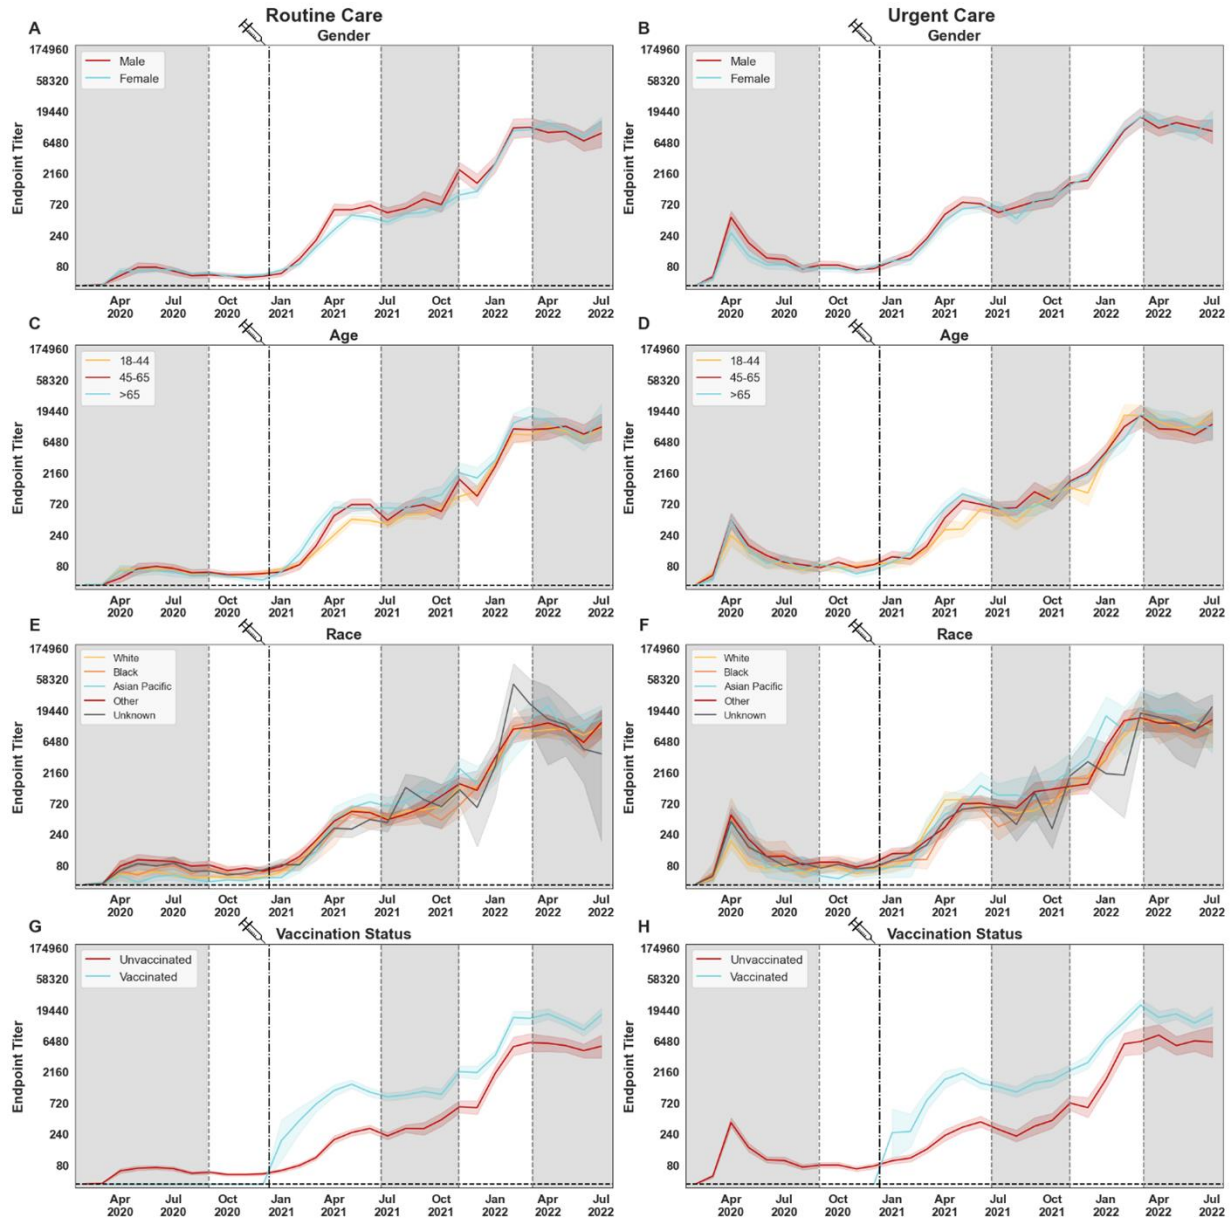

**Supplementary Figure 4. SARS-CoV-2 spike antibody titers by demographic groups and vaccination status.** SARS-CoV-2 spike antibody titers in the Routine Care (left column), and Urgent care (right column) groups measured between February 9<sup>th</sup> 2020 to July 18<sup>th</sup> 2022 stratified by gender (**A, B**), age (**C, D**), race (**E, F**), and vaccination status at the time of sample collection (**G, H**). Charts are fitted with a bootstrapped confidence interval based on random resampling of results to compute an estimate of the 95% confidence interval of the mean. **A, B.** Gender stratification: males, females. **C, D.** Categorical age levels: 18-44, 45-65, >65. Individuals <17 not shown in this analysis. **E, F.** Race stratification: White, Black, Asian and Pacific islander, Other, unknown. **G,H.** The date on which the first FDA-authorized SARS-CoV-2 vaccine became available in NYC is indicated by the vertical dotted line and syringe. Vaccination status was assessed at time of sample collection and does not reflect vaccination rates in NYC or within our patient population. Alternating shaded areas in all graphs denote the five successive

epidemiological waves of infection in NYC. Grey color and vertical dashed lines serve as visual contrast.

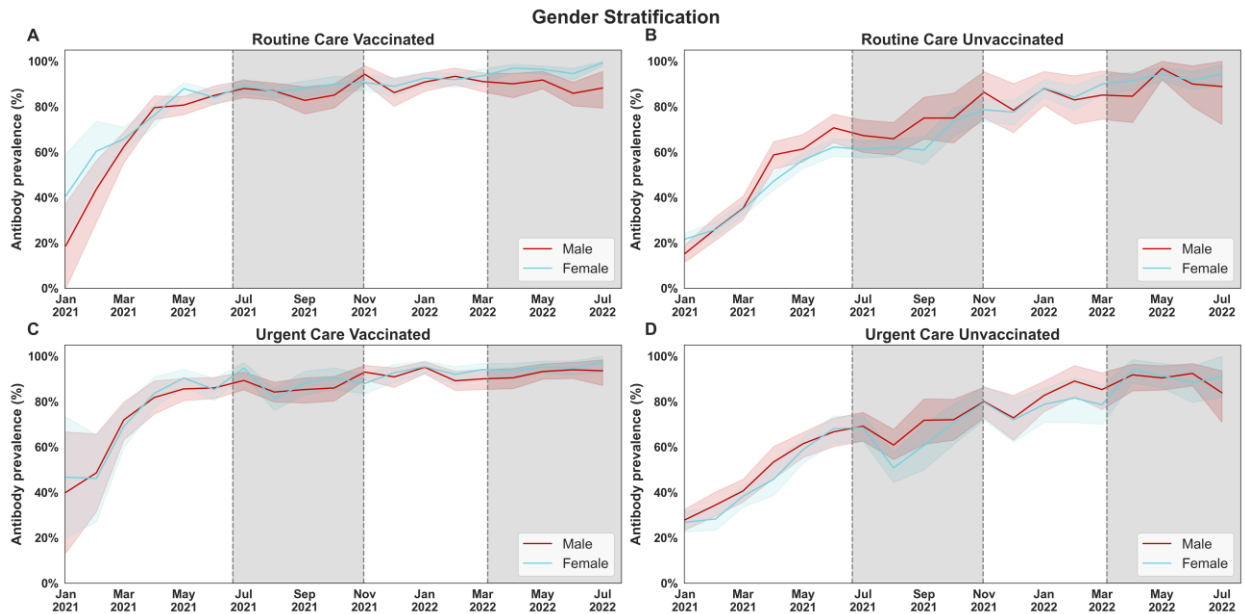

**Supplementary Figure 5. SARS-CoV-2 spike antibody prevalence stratified by sex and vaccination status.** Antibody prevalence in the Routine Care (top), and Urgent Care (bottom) groups, measured between February 9<sup>th</sup> 2020 to July 18<sup>th</sup> 2022, in vaccinated (left) and unvaccinated (right) individuals. Charts are fitted with a bootstrapped confidence interval based on random resampling of results to compute an estimate of the 95% confidence interval of the mean. Vaccination status was assessed at time of sample collection and does not reflect vaccination rates in NYC or within our patient population. Alternating shaded areas in all graphs denote the five successive epidemiological waves of infection in NYC. Grey color and vertical dashed lines serve as visual contrast.



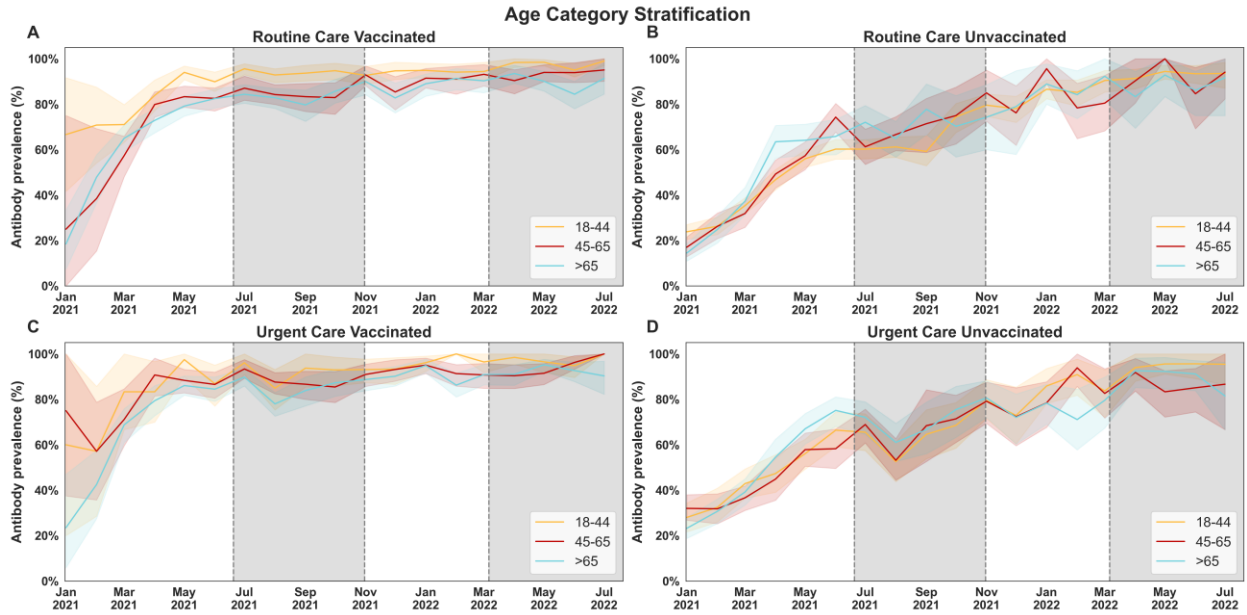

**Supplementary Figure 6. SARS-CoV-2 spike antibody prevalence stratified by age and vaccination status.** Antibody prevalence in the Routine Care (top), and Urgent Care (bottom) groups, measured between February 9<sup>th</sup> 2020 to July 18<sup>th</sup> 2022 in individuals with different categorical age levels (18-44, 45-65, and >65 year old) in vaccinated (left) and unvaccinated (right) individuals. Charts are fitted with a bootstrapped confidence interval based on random resampling of results to compute an estimate of the 95% confidence interval of the mean. Vaccination status was assessed at time of sample collection and does not reflect vaccination rates in NYC or within our patient population. Alternating shaded areas in all graphs denote the five successive epidemiological waves of infection in NYC. Grey color and vertical dashed lines serve as visual contrast.

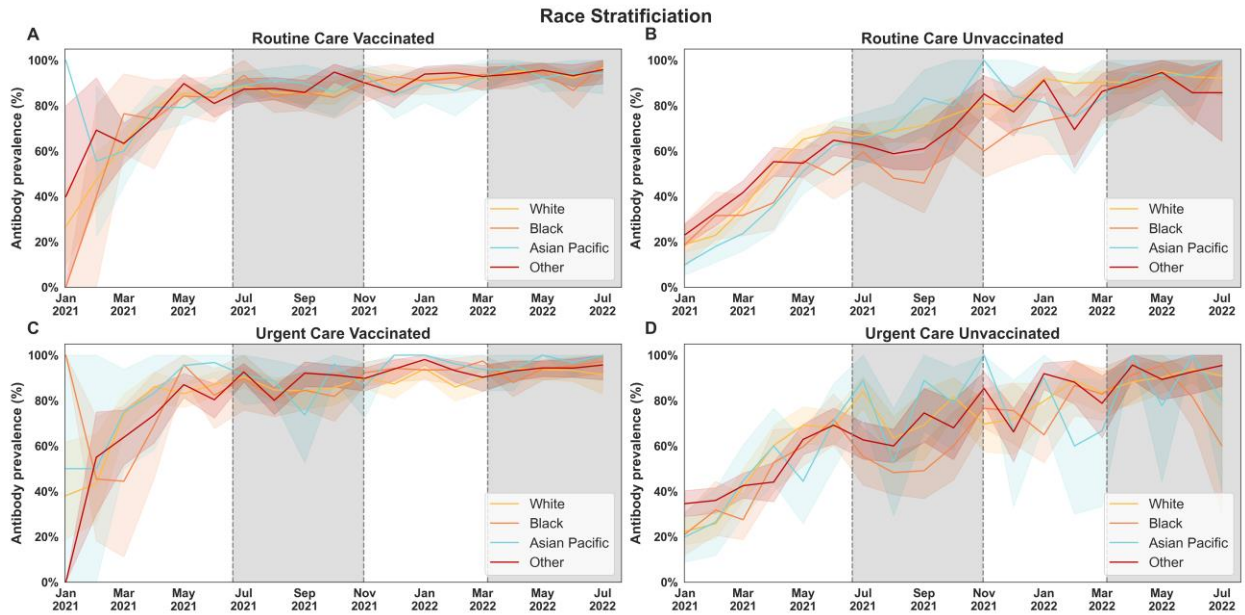

**Supplementary Figure 7. SARS-CoV-2 spike antibody prevalence stratified by race and vaccination status.** Antibody prevalence in the Routine Care (top), and Urgent Care (bottom) groups, measured between February 9<sup>th</sup> 2020 to July 18<sup>th</sup> 2022 in individuals of different racial categories (White, Black, Asian and Pacific islander, Other, unknown) in vaccinated (left) and unvaccinated (right) individuals. Charts are fitted with a bootstrapped confidence interval based on random resampling of results to compute an estimate of the 95% confidence interval of the mean. Vaccination status was assessed at time of sample collection and does not reflect vaccination rates in NYC or within our patient population. Alternating shaded areas in all graphs denote the five successive epidemiological waves of infection in NYC. Grey color and vertical dashed lines serve as visual contrast.

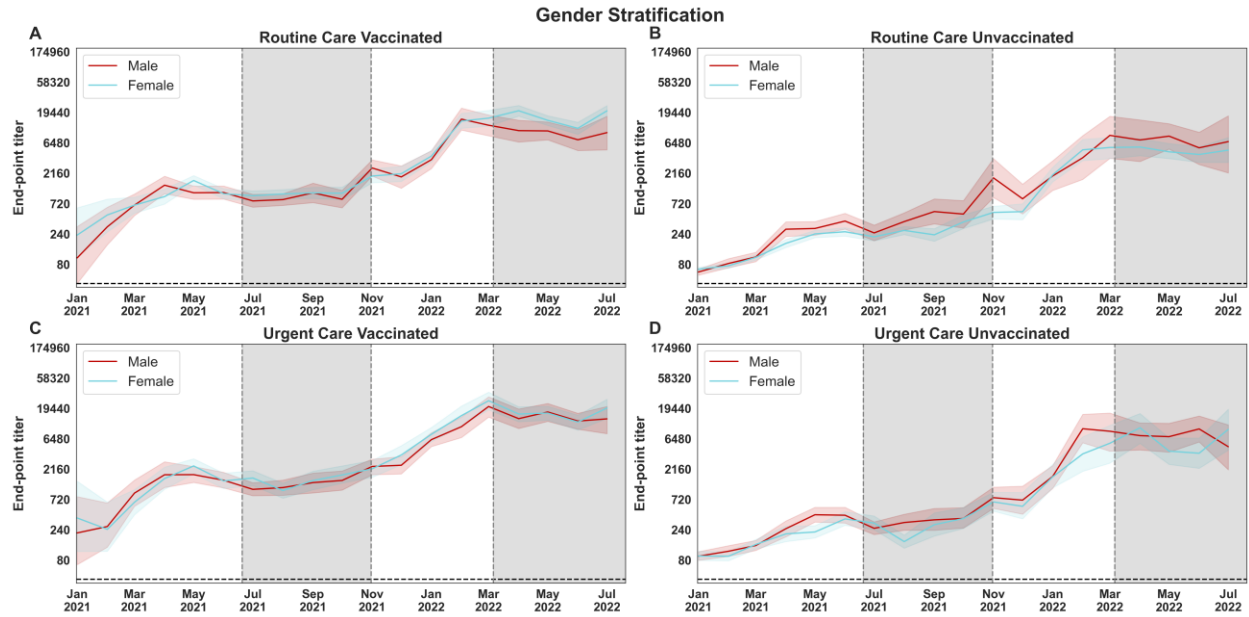

**Supplementary Figure 8. SARS-CoV-2 anti-spike antibody titers stratified by sex and vaccination status.** Antibody titers in the Routine Care (top), and Urgent Care (bottom) groups, measured between February 9<sup>th</sup> 2020 to July 18<sup>th</sup> 2022, in vaccinated (left) and unvaccinated (right) individuals. Charts are fitted with a bootstrapped confidence interval based on random resampling of results to compute an estimate of the 95% confidence interval of the mean. Vaccination status was assessed at time of sample collection and does not reflect vaccination rates in NYC or within our patient population. Alternating shaded areas in all graphs denote the five successive epidemiological waves of infection in NYC. Grey color and vertical dashed lines serve as visual contrast.



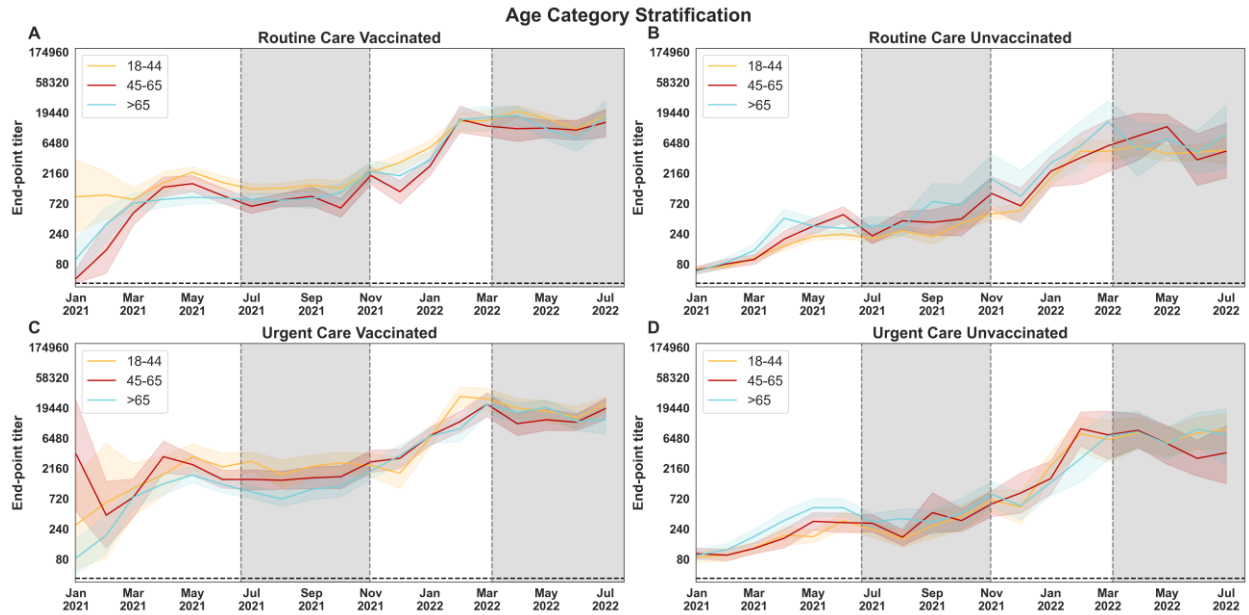

**Supplementary Figure 9. SARS-CoV-2 anti-spike antibody titers stratified by age and vaccination status.** Antibody titers in the Routine Care (top), and Urgent Care (bottom) groups, measured between February 9<sup>th</sup> 2020 to July 18<sup>th</sup> 2022 in individuals with different categorical age levels (18-44, 45-65, and >65 year old) in vaccinated (left) and unvaccinated (right) individuals. Charts are fitted with a bootstrapped confidence interval based on random resampling of results to compute an estimate of the 95% confidence interval of the mean. Vaccination status was assessed at time of sample collection and does not reflect vaccination rates in NYC or within our patient population. Alternating shaded areas in all graphs denote the five successive epidemiological waves of infection in NYC. Grey color and vertical dashed lines serve as visual contrast.

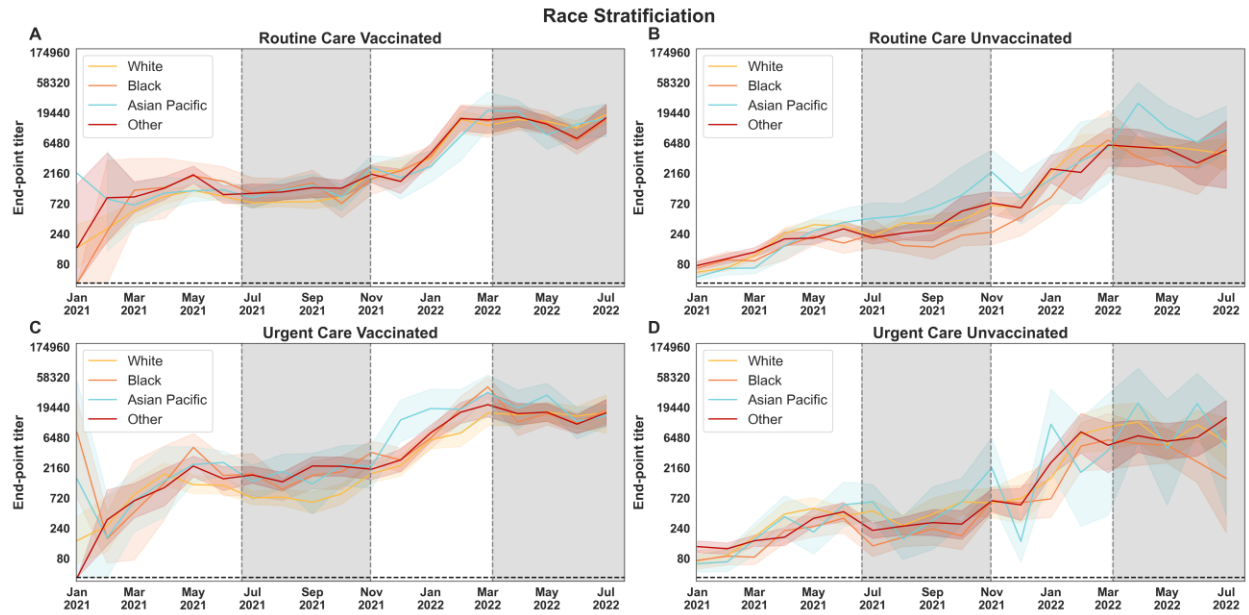

**Supplementary Figure 10. SARS-CoV-2 anti-spike antibody titers stratified by race and vaccination status.** Antibody titers in the Routine Care (top), and Urgent Care (bottom) groups, measured between February 9<sup>th</sup> 2020 to July 18<sup>th</sup> 2022 in individuals of different racial categories (White, Black, Asian and Pacific islander, Other, unknown) in vaccinated (left) and unvaccinated (right) individuals. Charts are fitted with a bootstrapped confidence interval based on random resampling of results to compute an estimate of the 95% confidence interval of the mean. Vaccination status was assessed at time of sample collection and does not reflect vaccination rates in NYC or within our patient population. Alternating shaded areas in all graphs denote the five successive epidemiological waves of infection in NYC. Grey color and vertical dashed lines serve as visual contrast.

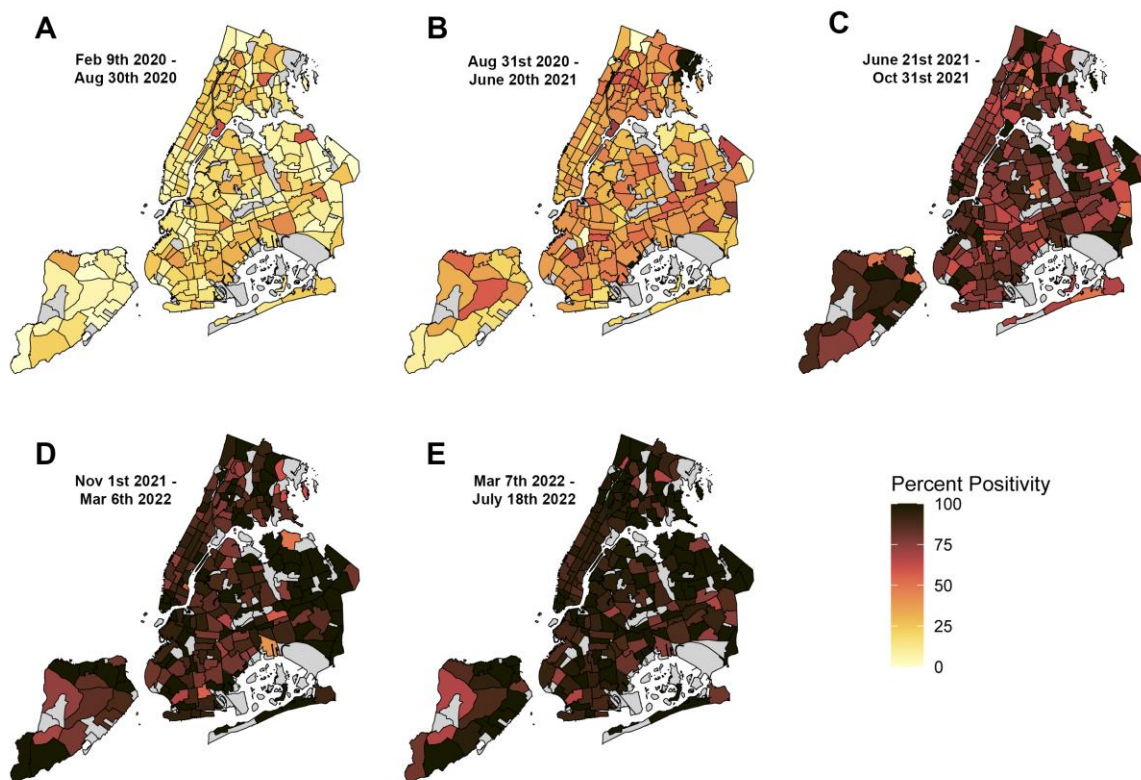

**Supplementary Figure 11. Geographical distribution of SARS-CoV-2 spike antibody prevalence during five epidemiological waves of COVID-19 in residents of New York City (NYC).** SARS-CoV-2 spike IgG prevalence measured in patients from the five boroughs of NYC (Manhattan, Brooklyn, Queens, The Bronx, and Staten Island, latitude and longitude: 40.7128° N, 74.0060° W) attending to a Mount Sinai Hospital in NYC are shown. 5 epidemiological waves corresponding to successive peaks of COVID-19 incidence in NYC are shown. **A.** Wave 1 (February 9<sup>th</sup> to August 30<sup>th</sup>, 2020). **B.** Wave 2 (August 31<sup>st</sup>, 2020, to June 20<sup>th</sup>, 2021). **C.** Wave 3 (June 21<sup>st</sup> to October 31<sup>st</sup>, 2021). **D.** Wave 4 (November 1<sup>st</sup>, 2021, to March 6<sup>th</sup>, 2022). **E.** Wave 5 (March 7<sup>th</sup> to July 18<sup>th</sup>, 2022). Antibody prevalence is expressed as percent positivity within neighborhood tabulation areas. Areas with less than 10 specimens are shaded grey. Color gradient depicts percent positivity (0 to 100%).

**Supplementary Table 1. Distribution of demographic status and SARS-CoV-2 spike protein seropositivity among children <18 years old in a SARS-CoV-2 serosurveillance system in New York City.**

|                               | Urgent care group |                    | Routine care group |                    |
|-------------------------------|-------------------|--------------------|--------------------|--------------------|
|                               | Total (col. %)    | S positive (row %) | Total (col. %)     | S positive (row %) |
| Overall                       | 354               | 166 (47%)          | 528                | 143 (27%)          |
| Wave                          |                   |                    |                    |                    |
| Wave 1 (through 30 Aug 2020)  | 114 (32%)         | 25 (22%)           | 293 (55%)          | 15 (5%)            |
| Wave 2 (through 20 June 2021) | 113 (32%)         | 33 (29%)           | 120 (23%)          | 33 (28%)           |
| Wave 3 (through 31 Oct 2021)  | 48 (14%)          | 38 (79%)           | 48 (9%)            | 29 (60%)           |
| Wave 4 (through 6 March 2022) | 33 (9%)           | 28 (85%)           | 44 (8%)            | 43 (98%)           |
| Wave 5 (through 18 July 2022) | 46 (13%)          | 42 (91%)           | 23 (4%)            | 23 (100%)          |
| Sex                           |                   |                    |                    |                    |
| Female                        | 181 (51%)         | 90 (50%)           | 272 (52%)          | 76 (28%)           |
| Male                          | 173 (49%)         | 76 (44%)           | 256 (48%)          | 67 (26%)           |
| Race/ethnicity                |                   |                    |                    |                    |
| Asian Pacific Islander        | 20 (6%)           | 13 (65%)           | 46 (9%)            | 14 (30%)           |
| Black                         | 53 (15%)          | 36 (68%)           | 18 (3%)            | 14 (78%)           |
| White                         | 73 (21%)          | 26 (36%)           | 161 (30%)          | 54 (34%)           |
| Other                         | 145 (41%)         | 78 (54%)           | 179 (34%)          | 56 (31%)           |
| Unknown                       | 63 (18%)          | 13 (21%)           | 124 (23%)          | 5 (4%)             |
| Insured                       |                   |                    |                    |                    |
| Private                       | 118 (33%)         | 49 (42%)           | 256 (48%)          | 69 (27%)           |
| Public                        | 213 (60%)         | 111 (52%)          | 219 (41%)          | 64 (29%)           |
| Other                         | 23 (7%)           | 6 (26%)            | 53 (10%)           | 10 (19%)           |
| Vaccinated                    |                   |                    |                    |                    |
| No                            | 310 (88%)         | 123 (40%)          | 508 (96%)          | 124 (24%)          |
| Yes                           | 44 (12%)          | 43 (98%)           | 20 (4%)            | 19 (95%)           |

**Supplementary Table 2. COVID-19 vaccination coverage over time among those receiving routine care in a SARS-CoV-2 serosurveillance system, New York City (N=33,489).**

|                           | Wave 1<br>(through 30<br>Aug 2020) | Wave 2 (through<br>20 June 2021) | Wave 3<br>(through 31<br>Oct 2021) | Wave 4<br>(through 6<br>March 2022) | Wave 5<br>(through 18<br>July 2022) |
|---------------------------|------------------------------------|----------------------------------|------------------------------------|-------------------------------------|-------------------------------------|
| Overall                   | 5/8634 (0%)                        | 2314/13562<br>(17%)              | 2816/5359<br>(53%)                 | 1714/2849<br>(60%)                  | 2056/3085<br>(67%)                  |
| Age                       |                                    |                                  |                                    |                                     |                                     |
| 18-44 years               | 1/4293 (0%)                        | 596/6506 (9%)                    | 962/2597<br>(37%)                  | 676/1509<br>(45%)                   | 875/1594<br>(55%)                   |
| 45-64 years               | 4/2134 (0%)                        | 684/3418 (20%)                   | 803/1276<br>(63%)                  | 470/635<br>(74%)                    | 547/692<br>(79%)                    |
| 65+ years                 | 0/2207 (0%)                        | 1034/3638<br>(28%)               | 1051/1486<br>(71%)                 | 568/705<br>(81%)                    | 634/799<br>(79%)                    |
| Sex                       |                                    |                                  |                                    |                                     |                                     |
| Female                    | 5/5903 (0%)                        | 1347/9326<br>(14%)               | 1747/3727<br>(47%)                 | 1129/2055<br>(55%)                  | 1355/2155<br>(63%)                  |
| Male                      | 0/2730 (0%)                        | 967/4236 (23%)                   | 1069/1632<br>(66%)                 | 585/794<br>(74%)                    | 701/930<br>(75%)                    |
| Race/ethnicity            |                                    |                                  |                                    |                                     |                                     |
| Asian Pacific<br>Islander | 0/767 (0%)                         | 296/1356 (22%)                   | 330/524 (63%)                      | 203/287<br>(71%)                    | 241/315<br>(77%)                    |
| Black                     | 0/386 (0%)                         | 151/955 (16%)                    | 331/662 (50%)                      | 292/461<br>(63%)                    | 374/494<br>(76%)                    |
| white                     | 2/3721 (0%)                        | 1122/5980<br>(19%)               | 1353/2447<br>(55%)                 | 713/1314<br>(54%)                   | 891/1509<br>(59%)                   |
| Other                     | 0/2234 (0%)                        | 529/3358 (16%)                   | 662/1359<br>(49%)                  | 488/744<br>(66%)                    | 523/721<br>(73%)                    |
| Unknown                   | 3/1526 (0%)                        | 216/1913 (11%)                   | 140/367 (38%)                      | 18/43 (42%)                         | 27/46 (59%)                         |
| Insured                   |                                    |                                  |                                    |                                     |                                     |
| Private                   | 4/4009 (0%)                        | 933/6647 (14%)                   | 1294/2626<br>(49%)                 | 759/1466<br>(52%)                   | 1000/1638<br>(61%)                  |
| Public                    | 1/3960 (0%)                        | 1239/6038<br>(21%)               | 1373/2418<br>(57%)                 | 834/1176<br>(71%)                   | 916/1232<br>(74%)                   |
| Other                     | 0/665 (0%)                         | 142/877 (16%)                    | 149/315 (47%)                      | 121/207<br>(58%)                    | 140/215<br>(65%)                    |

**Supplementary Table 3. Demographic characteristics by epidemiological wave among those receiving routine care in a SARS-CoV-2 serosurveillance system, New York City (N=33,489).**

|                    |                           | Wave 1<br>(through 30<br>Aug 2020) | Wave 2<br>(through 20<br>June 2021) | Wave 3<br>(through 31<br>Oct 2021) | Wave 4<br>(through 6<br>March<br>2022) | Wave 5<br>(through 18<br>July 2022) |
|--------------------|---------------------------|------------------------------------|-------------------------------------|------------------------------------|----------------------------------------|-------------------------------------|
| Age                | 18-44 years               | 4293 (50%)                         | 6506 (48%)                          | 2597 (48%)                         | 1509 (53%)                             | 1594 (52%)                          |
|                    | 45-64 years               | 2134 (25%)                         | 3418 (25%)                          | 1276 (24%)                         | 635 (22%)                              | 692 (22%)                           |
|                    | 65+ years                 | 2207 (26%)                         | 3638 (27%)                          | 1486 (28%)                         | 705 (25%)                              | 799 (26%)                           |
| Sex                | Female                    | 5903 (68%)                         | 9326 (69%)                          | 3727 (70%)                         | 2055 (72%)                             | 2155 (70%)                          |
|                    | Male                      | 2730 (32%)                         | 4236 (31%)                          | 1632 (30%)                         | 794 (28%)                              | 930 (30%)                           |
| Race/<br>ethnicity | Asian Pacific<br>Islander | 767 (9%)                           | 1356 (10%)                          | 524 (10%)                          | 287 (10%)                              | 315 (10%)                           |
|                    | Black                     | 386 (4%)                           | 955 (7%)                            | 662 (12%)                          | 461 (16%)                              | 494 (16%)                           |
|                    | white                     | 3721 (43%)                         | 5980 (44%)                          | 2447 (46%)                         | 1314 (46%)                             | 1509 (49%)                          |
|                    | Other                     | 2234 (26%)                         | 3358 (25%)                          | 1359 (25%)                         | 744 (26%)                              | 721 (23%)                           |
|                    | Unknown                   | 1526 (18%)                         | 1913 (14%)                          | 367 (7%)                           | 43 (2%)                                | 46 (1%)                             |
| Insured            | Private                   | 4009 (46%)                         | 6647 (49%)                          | 2626 (49%)                         | 1466 (51%)                             | 1638 (53%)                          |
|                    | Public                    | 3960 (46%)                         | 6038 (45%)                          | 2418 (45%)                         | 1176 (41%)                             | 1232 (40%)                          |
|                    | Other                     | 665 (8%)                           | 877 (6%)                            | 315 (6%)                           | 207 (7%)                               | 215 (7%)                            |
| Vaccinate<br>d     | No                        | 8629<br>(100%)                     | 11248<br>(83%)                      | 2543 (47%)                         | 1135 (40%)                             | 1029 (33%)                          |
|                    | Yes                       | 5 (0%)                             | 2314 (17%)                          | 2816 (53%)                         | 1714 (60%)                             | 2056 (67%)                          |



**Supplementary Table 4. Spike protein seropositivity among those receiving routine care in a SARS-CoV-2 serosurveillance system, New York City (N=33,489).**

|                        | Wave 1<br>(through 30<br>Aug 2020) | Wave 2<br>(through 20<br>June 2021) | Wave 3<br>(through 31<br>Oct 2021) | Wave 4<br>(through 6<br>March 2022) | Wave 5<br>(through 18<br>July 2022) |
|------------------------|------------------------------------|-------------------------------------|------------------------------------|-------------------------------------|-------------------------------------|
| Overall                | 1116 (13%)                         | 4909 (36%)                          | 4081 (76%)                         | 2502 (88%)                          | 2871 (93%)                          |
| Age                    |                                    |                                     |                                    |                                     |                                     |
| 18-44 years            | 641 (15%)                          | 2292 (35%)                          | 1914 (74%)                         | 1321 (88%)                          | 1516 (95%)                          |
| 45-64 years            | 260 (12%)                          | 1265 (37%)                          | 994 (78%)                          | 565 (89%)                           | 639 (92%)                           |
| 65+ years              | 215 (10%)                          | 1352 (37%)                          | 1173 (79%)                         | 616 (87%)                           | 716 (90%)                           |
| Sex                    |                                    |                                     |                                    |                                     |                                     |
| Female                 | 793 (13%)                          | 3320 (36%)                          | 2773 (74%)                         | 1791 (87%)                          | 2038 (95%)                          |
| Male                   | 323 (12%)                          | 1589 (38%)                          | 1308 (80%)                         | 711 (90%)                           | 833 (90%)                           |
| Race/ethnicity         |                                    |                                     |                                    |                                     |                                     |
| Asian Pacific Islander | 56 (7%)                            | 424 (31%)                           | 428 (82%)                          | 253 (88%)                           | 295 (94%)                           |
| Black                  | 53 (14%)                           | 365 (38%)                           | 457 (69%)                          | 382 (83%)                           | 456 (92%)                           |
| White                  | 386 (10%)                          | 2136 (36%)                          | 1924 (79%)                         | 1170 (89%)                          | 1408 (93%)                          |
| Other                  | 397 (18%)                          | 1360 (41%)                          | 1011 (74%)                         | 658 (88%)                           | 670 (93%)                           |
| Unknown                | 224 (15%)                          | 624 (33%)                           | 261 (71%)                          | 39 (91%)                            | 42 (91%)                            |
| Insured                |                                    |                                     |                                    |                                     |                                     |
| Private                | 503 (13%)                          | 2400 (36%)                          | 2044 (78%)                         | 1295 (88%)                          | 1536 (94%)                          |
| Public                 | 536 (14%)                          | 2183 (36%)                          | 1798 (74%)                         | 1026 (87%)                          | 1133 (92%)                          |
| Other                  | 77 (12%)                           | 326 (37%)                           | 239 (76%)                          | 181 (87%)                           | 202 (94%)                           |
| Vaccinated             |                                    |                                     |                                    |                                     |                                     |
| No                     | 1116 (13%)                         | 3131 (28%)                          | 1638 (64%)                         | 937 (83%)                           | 942 (92%)                           |
| Yes                    | 0 (0%)                             | 1778 (77%)                          | 2443 (87%)                         | 1565 (91%)                          | 1929 (94%)                          |

**Supplementary Table 5. Full parameter estimates from a multivariable Poisson regression of spike protein seropositivity among those receiving routine care in a SARS-CoV-2 serosurveillance system, New York City (N=33,488).**

|                               | PR (95% CI)          | P-value for parameter estimate (two-tailed Z test) | P-value for likelihood ratio test (two-tailed chi-square test) |
|-------------------------------|----------------------|----------------------------------------------------|----------------------------------------------------------------|
| Wave                          |                      |                                                    | <0.0001                                                        |
| Wave 1 (through 30 Aug 2020)  | ref                  |                                                    |                                                                |
| Wave 2 (through 20 June 2021) | 5.15 (4.26, 6.22)    | <0.0001                                            |                                                                |
| Wave 3 (through 31 Oct 2021)  | 11.51 (9.59, 13.81)  | <0.0001                                            |                                                                |
| Wave 4 (through 6 March 2022) | 12.23 (10.19, 14.67) | <0.0001                                            |                                                                |
| Wave 5 (through 18 July 2022) | 12.64 (10.55, 15.13) | <0.0001                                            |                                                                |
| Age                           |                      |                                                    | <0.0001                                                        |
| 18-44 years                   | 1.66 (1.41, 1.96)    | <0.0001                                            |                                                                |
| 45-64 years                   | 1.30 (1.09, 1.55)    | 0.0035                                             |                                                                |
| 65+ years                     | ref                  |                                                    |                                                                |
| Sex                           |                      |                                                    | 0.5882                                                         |
| Female                        | ref                  |                                                    |                                                                |
| Male                          | 1.04 (0.91, 1.19)    | 0.5865                                             |                                                                |
| Race/ethnicity                |                      |                                                    | <0.0001                                                        |
| Asian Pacific Islander        | 0.67 (0.51, 0.87)    | 0.0033                                             |                                                                |
| Black                         | 1.24 (0.94, 1.63)    | 0.1207                                             |                                                                |
| white                         | ref                  |                                                    |                                                                |
| Other                         | 1.64 (1.44, 1.88)    | <0.0001                                            |                                                                |
| Unknown                       | 1.33 (1.14, 1.56)    | 0.0004                                             |                                                                |
| Insured                       |                      |                                                    | 0.0258                                                         |
| Private                       | ref                  |                                                    |                                                                |
| Public                        | 1.14 (1.00, 1.29)    | 0.0432                                             |                                                                |
| Other                         | 0.88 (0.70, 1.11)    | 0.2882                                             |                                                                |
| Age*Wave                      |                      |                                                    | <0.0001                                                        |

|                               |                   |         |         |
|-------------------------------|-------------------|---------|---------|
| 18-44 years*Wave 2            | 0.57 (0.47, 0.68) | <0.0001 |         |
| 18-44 years*Wave 3            | 0.56 (0.47, 0.66) | <0.0001 |         |
| 18-44 years*Wave 4            | 0.61 (0.51, 0.72) | <0.0001 |         |
| 18-44 years*Wave 5            | 0.63 (0.53, 0.75) | <0.0001 |         |
| 45-64 years*Wave 2            | 0.75 (0.62, 0.91) | 0.0028  |         |
| 45-64 years*Wave 3            | 0.75 (0.63, 0.90) | 0.0019  |         |
| 45-64 years*Wave 4            | 0.79 (0.66, 0.94) | 0.0089  |         |
| 45-64 years*Wave 5            | 0.80 (0.67, 0.95) | 0.0131  |         |
| Sex*Wave                      |                   |         | 0.0001  |
| Male*Wave 2                   | 1.00 (0.86, 1.15) | 0.9678  |         |
| Male*Wave 3                   | 1.02 (0.89, 1.17) | 0.7941  |         |
| Male*Wave 4                   | 0.99 (0.86, 1.14) | 0.8958  |         |
| Male*Wave 5                   | 0.92 (0.81, 1.06) | 0.2630  |         |
| Race/ethnicity *Wave          |                   |         | <0.0001 |
| Asian Pacific Islander*Wave 2 | 1.31 (0.99, 1.74) | 0.0596  |         |
| Asian Pacific Islander*Wave 3 | 1.56 (1.19, 2.05) | 0.0013  |         |
| Asian Pacific Islander*Wave 4 | 1.48 (1.13, 1.94) | 0.0048  |         |
| Asian Pacific Islander*Wave 5 | 1.51 (1.15, 1.98) | 0.0029  |         |
| Black*Wave 2                  | 0.87 (0.65, 1.15) | 0.3292  |         |
| Black*Wave 3                  | 0.72 (0.54, 0.95) | 0.0200  |         |
| Black*Wave 4                  | 0.75 (0.57, 0.99) | 0.0416  |         |
| Black*Wave 5                  | 0.79 (0.60, 1.05) | 0.1004  |         |
| Other*Wave 2                  | 0.70 (0.60, 0.80) | <0.0001 |         |
| Other*Wave 3                  | 0.59 (0.51, 0.67) | <0.0001 |         |
| Other*Wave 4                  | 0.60 (0.52, 0.69) | <0.0001 |         |
| Other*Wave 5                  | 0.61 (0.53, 0.70) | <0.0001 |         |
| Unknown*Wave 2                | 0.69 (0.58, 0.83) | <0.0001 |         |
| Unknown*Wave 3                | 0.69 (0.58, 0.82) | <0.0001 |         |
| Unknown*Wave 4                | 0.77 (0.64, 0.92) | 0.0053  |         |
| Unknown*Wave 5                | 0.73 (0.61, 0.87) | 0.0005  |         |

|               |                   |        |        |
|---------------|-------------------|--------|--------|
| Insured*Wave  |                   |        | 0.0018 |
| Public*Wave 2 | 0.85 (0.74, 0.97) | 0.0163 |        |
| Public*Wave 3 | 0.82 (0.72, 0.93) | 0.0021 |        |
| Public*Wave 4 | 0.87 (0.77, 0.99) | 0.0402 |        |
| Public*Wave 5 | 0.89 (0.78, 1.01) | 0.0716 |        |
| Other*Wave 2  | 1.15 (0.90, 1.47) | 0.2736 |        |
| Other*Wave 3  | 1.11 (0.87, 1.40) | 0.4013 |        |
| Other*Wave 4  | 1.12 (0.89, 1.42) | 0.3338 |        |
| Other*Wave 5  | 1.14 (0.90, 1.44) | 0.2719 |        |

**Supplementary Table 6. Multivariable Poisson regression of spike protein seropositivity among the unvaccinated in routine care visits in a SARS-CoV-2 serosurveillance system, New York City (N=24,584).**

|                        | Wave 1<br>(through 30<br>Aug 2020) | Wave 2<br>(through 20<br>June 2021) | Wave 3<br>(through 31<br>Oct 2021) | Wave 4<br>(through 6<br>March 2022) | Wave 5 (through<br>18 July 2022) |
|------------------------|------------------------------------|-------------------------------------|------------------------------------|-------------------------------------|----------------------------------|
|                        | PR (95% CI)                        | PR (95% CI)                         | PR (95% CI)                        | PR (95% CI)                         | PR (95% CI)                      |
| Age                    |                                    |                                     |                                    |                                     |                                  |
| 18-44 years            | <b>1.66 (1.41, 1.96)</b>           | <b>1.26 (1.15, 1.39)</b>            | <b>0.90 (0.83, 0.99)</b>           | 1.03 (0.93, 1.14)                   | 1.05 (0.97, 1.12)                |
| 45-64 years            | <b>1.30 (1.09, 1.55)</b>           | <b>1.12 (1.02, 1.24)</b>            | 0.98 (0.89, 1.08)                  | 1.07 (0.95, 1.19)                   | 1.01 (0.92, 1.10)                |
| 65+ years              | ref                                | ref                                 | ref                                | ref                                 | ref                              |
| Sex                    |                                    |                                     |                                    |                                     |                                  |
| Female                 | ref                                | ref                                 | ref                                | ref                                 | ref                              |
| Male                   | 1.04 (0.91, 1.19)                  | 1.04 (0.97, 1.12)                   | 1.05 (0.98, 1.14)                  | 1.02 (0.95, 1.10)                   | 0.99 (0.94, 1.05)                |
| Race/ethnicity         |                                    |                                     |                                    |                                     |                                  |
| Asian Pacific Islander | <b>0.67 (0.51, 0.87)</b>           | <b>0.70 (0.61, 0.80)</b>            | 1.01 (0.91, 1.11)                  | 1.00 (0.91, 1.09)                   | 1.00 (0.93, 1.08)                |
| Black                  | 1.24 (0.94, 1.63)                  | <b>1.15 (1.03, 1.29)</b>            | <b>0.77 (0.69, 0.87)</b>           | <b>0.78 (0.70, 0.88)</b>            | 0.98 (0.92, 1.05)                |
| white                  | ref                                | ref                                 | ref                                | ref                                 | ref                              |
| Other                  | <b>1.64 (1.44, 1.88)</b>           | <b>1.26 (1.17, 1.35)</b>            | 0.93 (0.87, 1.00)                  | 0.95 (0.89, 1.02)                   | 0.97 (0.92, 1.02)                |
| Unknown                | <b>1.33 (1.14, 1.56)</b>           | 1.02 (0.93, 1.11)                   | <b>0.87 (0.78, 0.98)</b>           | 1.02 (0.88, 1.19)                   | 1.02 (0.92, 1.14)                |
| Insured                |                                    |                                     |                                    |                                     |                                  |
| Private                | ref                                | ref                                 | ref                                | ref                                 | ref                              |
| Public                 | <b>1.14 (1.00, 1.29)</b>           | 0.95 (0.89, 1.02)                   | <b>0.92 (0.86, 0.99)</b>           | 1.02 (0.95, 1.10)                   | 1.01 (0.96, 1.07)                |
| Other                  | 0.88 (0.70, 1.11)                  | 1.01 (0.90, 1.14)                   | 0.96 (0.84, 1.09)                  | 0.96 (0.85, 1.07)                   | 0.99 (0.92, 1.07)                |

Note: Full list of p-values in Supplementary Table 7.

**Supplementary Table 7. Full parameter estimates from a multivariable Poisson regression of spike protein seropositivity among the unvaccinated in routine care visits in a SARS-CoV-2 serosurveillance system, New York City (N=24,584).**

|                               | PR (95% CI)          | P-value for parameter estimate (two-tailed Z test) | P-value for likelihood ratio test (two-tailed chi-square test) |
|-------------------------------|----------------------|----------------------------------------------------|----------------------------------------------------------------|
| Wave                          |                      |                                                    | <0.0001                                                        |
| Wave 1 (through 30 Aug 2020)  | ref                  |                                                    |                                                                |
| Wave 2 (through 20 June 2021) | 3.18 (2.60, 3.89)    | <.0001                                             |                                                                |
| Wave 3 (through 31 Oct 2021)  | 10.40 (8.52, 12.70)  | <.0001                                             |                                                                |
| Wave 4 (through 6 March 2022) | 11.55 (9.41, 14.16)  | <.0001                                             |                                                                |
| Wave 5 (through 18 July 2022) | 12.37 (10.21, 14.99) | <.0001                                             |                                                                |
| Age                           |                      |                                                    | <0.0001                                                        |
| 18-44 years                   | 1.66 (1.41, 1.96)    | <.0001                                             |                                                                |
| 45-64 years                   | 1.30 (1.09, 1.55)    | 0.0033                                             |                                                                |
| 65+ years                     | ref                  |                                                    |                                                                |
| Sex                           |                      |                                                    | 0.6008                                                         |
| Female                        | ref                  |                                                    |                                                                |
| Male                          | 1.04 (0.91, 1.19)    | 0.5992                                             |                                                                |
| Race/ethnicity                |                      |                                                    | <0.0001                                                        |
| Asian Pacific Islander        | 0.67 (0.51, 0.87)    | 0.0033                                             |                                                                |
| Black                         | 1.24 (0.94, 1.63)    | 0.1216                                             |                                                                |
| white                         | ref                  |                                                    |                                                                |
| Other                         | 1.64 (1.44, 1.88)    | <.0001                                             |                                                                |
| Unknown                       | 1.33 (1.14, 1.56)    | 0.0004                                             |                                                                |
| Insured                       |                      |                                                    | 0.0263                                                         |
| Private                       | ref                  |                                                    |                                                                |
| Public                        | 1.14 (1.00, 1.29)    | 0.0445                                             |                                                                |
| Other                         | 0.88 (0.70, 1.11)    | 0.2852                                             |                                                                |
| Age*Wave                      |                      |                                                    | <0.0001                                                        |



|                               |                   |        |         |
|-------------------------------|-------------------|--------|---------|
| 18-44 years*Wave 2            | 0.76 (0.63, 0.92) | 0.0047 |         |
| 18-44 years*Wave 3            | 0.54 (0.45, 0.66) | <.0001 |         |
| 18-44 years*Wave 4            | 0.62 (0.51, 0.75) | <.0001 |         |
| 18-44 years*Wave 5            | 0.63 (0.53, 0.75) | <.0001 |         |
| 45-64 years*Wave 2            | 0.86 (0.71, 1.05) | 0.1503 |         |
| 45-64 years*Wave 3            | 0.75 (0.62, 0.92) | 0.0059 |         |
| 45-64 years*Wave 4            | 0.82 (0.67, 1.01) | 0.0617 |         |
| 45-64 years*Wave 5            | 0.77 (0.64, 0.94) | 0.0102 |         |
| Sex*Wave                      |                   |        | 0.7752  |
| Male*Wave 2                   | 1.00 (0.86, 1.17) | 0.9536 |         |
| Male*Wave 3                   | 1.02 (0.87, 1.19) | 0.8377 |         |
| Male*Wave 4                   | 0.98 (0.84, 1.15) | 0.8419 |         |
| Male*Wave 5                   | 0.96 (0.83, 1.11) | 0.5768 |         |
| Race/ethnicity *Wave          |                   |        | <0.0001 |
| Asian Pacific Islander*Wave 2 | 1.04 (0.77, 1.41) | 0.7849 |         |
| Asian Pacific Islander*Wave 3 | 1.51 (1.13, 2.01) | 0.0050 |         |
| Asian Pacific Islander*Wave 4 | 1.49 (1.12, 1.98) | 0.0061 |         |
| Asian Pacific Islander*Wave 5 | 1.50 (1.14, 1.98) | 0.0042 |         |
| Black*Wave 2                  | 0.93 (0.69, 1.25) | 0.6310 |         |
| Black*Wave 3                  | 0.62 (0.46, 0.84) | 0.0018 |         |
| Black*Wave 4                  | 0.63 (0.47, 0.85) | 0.0022 |         |
| Black*Wave 5                  | 0.79 (0.60, 1.05) | 0.1050 |         |
| Other*Wave 2                  | 0.76 (0.66, 0.89) | 0.0006 |         |
| Other*Wave 3                  | 0.57 (0.49, 0.66) | <.0001 |         |
| Other*Wave 4                  | 0.58 (0.50, 0.68) | <.0001 |         |
| Other*Wave 5                  | 0.59 (0.51, 0.68) | <.0001 |         |
| Unknown*Wave 2                | 0.76 (0.64, 0.92) | 0.0039 |         |
| Unknown*Wave 3                | 0.66 (0.54, 0.80) | <.0001 |         |
| Unknown*Wave 4                | 0.77 (0.62, 0.96) | 0.0188 |         |
| Unknown*Wave 5                | 0.77 (0.63, 0.93) | 0.0067 |         |

|               |                   |        |        |
|---------------|-------------------|--------|--------|
| Insured*Wave  |                   |        | 0.0612 |
| Public*Wave 2 | 0.84 (0.73, 0.97) | 0.0146 |        |
| Public*Wave 3 | 0.81 (0.70, 0.94) | 0.0044 |        |
| Public*Wave 4 | 0.90 (0.78, 1.04) | 0.1546 |        |
| Public*Wave 5 | 0.89 (0.78, 1.02) | 0.1003 |        |
| Other*Wave 2  | 1.15 (0.89, 1.49) | 0.2924 |        |
| Other*Wave 3  | 1.09 (0.84, 1.41) | 0.5386 |        |
| Other*Wave 4  | 1.08 (0.84, 1.40) | 0.5400 |        |
| Other*Wave 5  | 1.13 (0.88, 1.43) | 0.3385 |        |

**Supplementary Table 8. Multivariable Poisson regression of spike protein seropositivity among those receiving routine care in a SARS-CoV-2 serosurveillance system, New York City (N=19,168).**

|                              | Wave 2<br>(January 11 <sup>a</sup><br>through 20 June<br>2021) | Wave 3 (through<br>31 Oct 2021) | Wave 4 (through<br>6 March 2022) | Wave 5 (through<br>18 July 2022) | p-<br>value <sup>b</sup> |
|------------------------------|----------------------------------------------------------------|---------------------------------|----------------------------------|----------------------------------|--------------------------|
|                              | PR (95% CI)                                                    | PR (95% CI)                     | PR (95% CI)                      | PR (95% CI)                      |                          |
| Age                          |                                                                |                                 |                                  |                                  | 0.7440                   |
| 18-44 years                  | <b>1.07 (1.01, 1.13)</b>                                       | 1.02 (0.98, 1.07)               | <b>1.05 (1.01, 1.09)</b>         | <b>1.06 (1.03, 1.09)</b>         |                          |
| 45-64 years                  | 1.01 (0.95, 1.07)                                              | 1.00 (0.96, 1.04)               | 1.03 (0.98, 1.07)                | <b>1.04 (1.00, 1.07)</b>         |                          |
| 65+ years                    | ref                                                            | ref                             | ref                              | ref                              |                          |
| Sex                          |                                                                |                                 |                                  |                                  | 0.0001                   |
| Female                       | ref                                                            | ref                             | ref                              | ref                              |                          |
| Male                         | 1.03 (0.99, 1.08)                                              | <b>1.05 (1.01, 1.08)</b>        | 1.03 (0.99, 1.06)                | <b>0.96 (0.94, 0.99)</b>         |                          |
| Race/ethnicity               |                                                                |                                 |                                  |                                  | <.0001                   |
| Asian<br>Pacific<br>Islander | <b>0.86 (0.80, 0.93)</b>                                       | 1.02 (0.98, 1.07)               | 0.97 (0.93, 1.02)                | 1.00 (0.97, 1.04)                |                          |
| Black                        | 1.00 (0.92, 1.09)                                              | <b>0.90 (0.85, 0.95)</b>        | <b>0.92 (0.88, 0.97)</b>         | 0.98 (0.95, 1.01)                |                          |
| White                        | ref                                                            | ref                             | ref                              | ref                              |                          |
| Other                        | <b>1.05 (1.00, 1.11)</b>                                       | 0.97 (0.94, 1.01)               | 0.98 (0.95, 1.01)                | 0.99 (0.97, 1.02)                |                          |
| Unknown                      | 0.94 (0.88, 1.01)                                              | 0.96 (0.90, 1.02)               | 1.03 (0.93, 1.13)                | 0.97 (0.89, 1.05)                |                          |
| Insured                      |                                                                |                                 |                                  |                                  | 0.0509                   |
| Private                      | ref                                                            | ref                             | ref                              | ref                              |                          |
| Public                       | 0.96 (0.91, 1.00)                                              | <b>0.94 (0.91, 0.97)</b>        | 0.99 (0.96, 1.02)                | 1.01 (0.99, 1.04)                |                          |
| Other                        | 1.00 (0.92, 1.09)                                              | 0.98 (0.92, 1.05)               | 0.99 (0.94, 1.04)                | 1.01 (0.97, 1.04)                |                          |
| Vaccinated                   |                                                                |                                 |                                  |                                  | <.0001                   |
| No                           | ref                                                            | ref                             | ref                              | ref                              |                          |
| Yes                          | <b>1.95 (1.87, 2.03)</b>                                       | <b>1.35 (1.30, 1.39)</b>        | <b>1.12 (1.09, 1.16)</b>         | <b>1.04 (1.02, 1.07)</b>         |                          |

Notes: PR: prevalence ratio; CI: confidence interval

<sup>a</sup> Earlier dates excluded. Analysis limited to the time frame where vaccine was available (N=19,168).

<sup>a</sup> a p-value for interaction term between wave and characteristic according to a two-tailed chi-square type 3 analysis. Significant values indicate substantial changes in PRs across waves for a specific characteristic. Full list of p-values in Supplementary Table 9.

**Supplementary Table 9. Full parameter estimates from a multivariable Poisson regression of spike protein seropositivity among those receiving routine care in a SARS-CoV-2 serosurveillance system, New York City (N=19,168).**

|                               | PR (95% CI)       | P-value for parameter estimate (two-tailed Z test) | P-value for likelihood ratio test (two-tailed chi-square test) |
|-------------------------------|-------------------|----------------------------------------------------|----------------------------------------------------------------|
| Wave                          |                   |                                                    | <0.0001                                                        |
| Wave 2 (through 20 June 2021) | Ref               |                                                    |                                                                |
| Wave 3 (through 31 Oct 2021)  | 1.67 (1.53, 1.82) | <.0001                                             |                                                                |
| Wave 4 (through 6 March 2022) | 2.05 (1.88, 2.23) | <.0001                                             |                                                                |
| Wave 5 (through 18 July 2022) | 2.24 (2.07, 2.42) | <.0001                                             |                                                                |
| Age                           |                   |                                                    | 0.0548                                                         |
| 18-44 years                   | 1.07 (1.01, 1.13) | 0.0311                                             |                                                                |
| 45-64 years                   | 1.01 (0.95, 1.07) | 0.7530                                             |                                                                |
| 65+ years                     | ref               |                                                    |                                                                |
| Sex                           |                   |                                                    | 0.1669                                                         |
| Female                        | ref               |                                                    |                                                                |
| Male                          | 1.03 (0.99, 1.08) | 0.1658                                             |                                                                |
| Race/ethnicity                |                   |                                                    | <0.0001                                                        |
| Asian Pacific Islander        | 0.86 (0.80, 0.93) | <.0001                                             |                                                                |
| Black                         | 1.00 (0.92, 1.09) | 0.9537                                             |                                                                |
| white                         | ref               |                                                    |                                                                |
| Other                         | 1.05 (1.00, 1.11) | 0.0391                                             |                                                                |
| Unknown                       | 0.94 (0.88, 1.01) | 0.0853                                             |                                                                |
| Insured                       |                   |                                                    | 0.1726                                                         |
| Private                       | ref               |                                                    |                                                                |
| Public                        | 0.96 (0.91, 1.00) | 0.0752                                             |                                                                |
| Other                         | 1.00 (0.92, 1.09) | 0.9135                                             |                                                                |
| Vaccinated                    |                   |                                                    | <0.0001                                                        |
| No                            | ref               |                                                    |                                                                |
| Yes                           | 1.95 (1.87, 2.03) | <.0001                                             |                                                                |

|                               |                   |        |         |
|-------------------------------|-------------------|--------|---------|
| Age*Wave                      |                   |        | 0.7440  |
| 18-44 years*Wave 3            | 0.96 (0.89, 1.03) | 0.2628 |         |
| 18-44 years*Wave 4            | 0.98 (0.91, 1.05) | 0.5951 |         |
| 18-44 years*Wave 5            | 0.99 (0.93, 1.06) | 0.8488 |         |
| 45-64 years*Wave 3            | 0.99 (0.92, 1.06) | 0.7806 |         |
| 45-64 years*Wave 4            | 1.02 (0.95, 1.09) | 0.6273 |         |
| 45-64 years*Wave 5            | 1.03 (0.96, 1.10) | 0.4366 |         |
| Sex*Wave                      |                   |        | 0.0001  |
| Male*Wave 3                   | 1.01 (0.95, 1.07) | 0.6861 |         |
| Male*Wave 4                   | 0.99 (0.94, 1.05) | 0.8251 |         |
| Male*Wave 5                   | 0.93 (0.88, 0.98) | 0.0068 |         |
| Race/ethnicity *Wave          |                   |        | <0.0001 |
| Asian Pacific Islander*Wave 3 | 1.18 (1.08, 1.29) | 0.0001 |         |
| Asian Pacific Islander*Wave 4 | 1.13 (1.03, 1.23) | 0.0066 |         |
| Asian Pacific Islander*Wave 5 | 1.16 (1.07, 1.26) | 0.0003 |         |
| Black*Wave 3                  | 0.90 (0.82, 0.99) | 0.0303 |         |
| Black*Wave 4                  | 0.92 (0.84, 1.01) | 0.0919 |         |
| Black*Wave 5                  | 0.98 (0.90, 1.07) | 0.6093 |         |
| Other*Wave 3                  | 0.92 (0.87, 0.98) | 0.0115 |         |
| Other*Wave 4                  | 0.93 (0.87, 0.99) | 0.0164 |         |
| Other*Wave 5                  | 0.94 (0.89, 1.00) | 0.0381 |         |
| Unknown*Wave 3                | 1.02 (0.93, 1.12) | 0.6695 |         |
| Unknown*Wave 4                | 1.09 (0.97, 1.23) | 0.1574 |         |
| Unknown*Wave 5                | 1.03 (0.92, 1.15) | 0.6116 |         |
| Insured*Wave                  |                   |        | 0.0509  |
| Public*Wave 3                 | 0.98 (0.93, 1.04) | 0.5805 |         |
| Public*Wave 4                 | 1.03 (0.97, 1.10) | 0.2882 |         |
| Public*Wave 5                 | 1.06 (1.00, 1.12) | 0.0473 |         |
| Other*Wave 3                  | 0.98 (0.88, 1.09) | 0.6907 |         |
| Other*Wave 4                  | 0.98 (0.89, 1.09) | 0.7394 |         |

|                   |                   |        |         |
|-------------------|-------------------|--------|---------|
| Other*Wave 5      | 1.00 (0.91, 1.10) | 0.9937 |         |
| Vaccinated*Wave   |                   |        | <0.0001 |
| Vaccinated*Wave 3 | 0.69 (0.66, 0.73) | <.0001 |         |
| Vaccinated*Wave 4 | 0.58 (0.55, 0.61) | <.0001 |         |
| Vaccinated*Wave 5 | 0.53 (0.51, 0.56) | <.0001 |         |



**Supplementary Table 10. Multivariable Poisson regression of spike protein seropositivity in a SARS-CoV-2 serosurveillance system, adults 18-64, New York City (N=24,653).**

|                        | Wave 1<br>(through 30<br>Aug 2020) | Wave 2<br>(through 20<br>June 2021) | Wave 3<br>(through 31<br>Oct 2021) | Wave 4<br>(through 6<br>March 2022) | Wave 5<br>(through 18<br>July 2022) | p-<br>value <sup>a</sup> |
|------------------------|------------------------------------|-------------------------------------|------------------------------------|-------------------------------------|-------------------------------------|--------------------------|
|                        | PR (95%<br>CI)                     | PR (95% CI)                         | PR (95% CI)                        | PR (95% CI)                         | PR (95% CI)                         |                          |
| Age                    |                                    |                                     |                                    |                                     |                                     | 0.0013                   |
| 18-44 years            | <b>1.26 (1.09, 1.46)</b>           | 0.96 (0.90, 1.02)                   | 0.96 (0.92, 1.01)                  | 0.99 (0.95, 1.02)                   | 1.02 (0.99, 1.04)                   |                          |
| 45-64 years            | ref                                | ref                                 | ref                                | ref                                 | ref                                 |                          |
| Sex                    |                                    |                                     |                                    |                                     |                                     | 0.0035                   |
| Female                 | ref                                | ref                                 | ref                                | ref                                 | ref                                 |                          |
| Male                   | 1.01 (0.86, 1.19)                  | 1.02 (0.96, 1.10)                   | <b>1.09 (1.04, 1.14)</b>           | 1.03 (0.99, 1.07)                   | 0.97 (0.95, 1.00)                   |                          |
| Race/ethnicity         |                                    |                                     |                                    |                                     |                                     | <.0001                   |
| Asian Pacific Islander | <b>0.67 (0.51, 0.89)</b>           | <b>0.80 (0.72, 0.89)</b>            | <b>1.07 (1.02, 1.13)</b>           | 1.02 (0.98, 1.07)                   | 1.01 (0.98, 1.05)                   |                          |
| Black                  | 1.27 (0.95, 1.69)                  | 1.05 (0.95, 1.16)                   | <b>0.89 (0.84, 0.95)</b>           | <b>0.91 (0.86, 0.97)</b>            | 1.01 (0.98, 1.04)                   |                          |
| White                  | ref                                | ref                                 | ref                                | ref                                 | ref                                 |                          |
| Other                  | <b>1.55 (1.33, 1.81)</b>           | <b>1.12 (1.05, 1.20)</b>            | <b>0.95 (0.91, 1.00)</b>           | 0.97 (0.93, 1.01)                   | 0.99 (0.97, 1.02)                   |                          |
| Unknown                | <b>1.22 (1.02, 1.45)</b>           | 0.93 (0.85, 1.01)                   | <b>0.89 (0.81, 0.96)</b>           | 1.01 (0.92, 1.12)                   | <b>1.06 (1.04, 1.07)</b>            |                          |
| Insured                |                                    |                                     |                                    |                                     |                                     | 0.1064                   |
| Private                | ref                                | ref                                 | ref                                | ref                                 | ref                                 |                          |
| Public                 | 1.12 (0.98, 1.28)                  | 0.98 (0.92, 1.04)                   | <b>0.93 (0.89, 0.97)</b>           | 1.00 (0.96, 1.04)                   | 1.00 (0.97, 1.03)                   |                          |
| Other                  | 0.95 (0.75, 1.20)                  | 1.01 (0.91, 1.12)                   | 0.99 (0.92, 1.06)                  | 0.97 (0.92, 1.04)                   | 1.00 (0.96, 1.04)                   |                          |

Notes:

PR: prevalence ratio; CI: confidence interval

<sup>a</sup> a p-value for interaction term between wave and characteristic according to a two-tailed chi-square type 3 analysis. Significant values indicate substantial changes in PRs across waves for a specific characteristic. Full list of p-values in Supplementary Table 11.

**Supplementary Table 11. Full parameter estimates from a multivariable Poisson regression of spike protein seropositivity in a SARS-CoV-2 serosurveillance system, adults 18-64, New York City (N=24,653).**

|                               | PR (95% CI)        | P-value for parameter estimate (two-tailed Z test) | P-value for likelihood ratio test (two-tailed chi-square test) |
|-------------------------------|--------------------|----------------------------------------------------|----------------------------------------------------------------|
| Wave                          |                    |                                                    | <0.0001                                                        |
| Wave 1 (through 30 Aug 2020)  | ref                |                                                    |                                                                |
| Wave 2 (through 20 June 2021) | 3.72 (3.13, 4.43)  | <.0001                                             |                                                                |
| Wave 3 (through 31 Oct 2021)  | 8.09 (6.85, 9.56)  | <.0001                                             |                                                                |
| Wave 4 (through 6 March 2022) | 9.18 (7.78, 10.82) | <.0001                                             |                                                                |
| Wave 5 (through 18 July 2022) | 9.47 (8.05, 11.14) | <.0001                                             |                                                                |
| Age                           |                    |                                                    | 0.0013                                                         |
| 18-44 years                   | 1.26 (1.09, 1.46)  | 0.0018                                             |                                                                |
| 45-64 years                   | ref                | 0.0035                                             |                                                                |
| Sex                           |                    |                                                    | 0.8849                                                         |
| Female                        | ref                |                                                    |                                                                |
| Male                          | 1.01 (0.86, 1.19)  | 0.8846                                             |                                                                |
| Race/ethnicity                |                    |                                                    | <0.0001                                                        |
| Asian Pacific Islander        | 0.67 (0.51, 0.89)  | 0.0063                                             |                                                                |
| Black                         | 1.27 (0.95, 1.69)  | 0.1071                                             |                                                                |
| white                         | ref                |                                                    |                                                                |
| Other                         | 1.55 (1.33, 1.81)  | <.0001                                             |                                                                |
| Unknown                       | 1.22 (1.02, 1.45)  | 0.0278                                             |                                                                |
| Insured                       |                    |                                                    | 0.1847                                                         |
| Private                       | ref                |                                                    |                                                                |
| Public                        | 1.12 (0.98, 1.28)  | 0.1090                                             |                                                                |
| Other                         | 0.95 (0.75, 1.20)  | 0.6462                                             |                                                                |
| Age*Wave                      |                    |                                                    | 0.0013                                                         |
| 18-44 years*Wave 2            | 0.76 (0.65, 0.89)  | 0.0007                                             |                                                                |

|                               |                   |        |         |
|-------------------------------|-------------------|--------|---------|
| 18-44 years*Wave 3            | 0.76 (0.65, 0.89) | 0.0005 |         |
| 18-44 years*Wave 4            | 0.78 (0.67, 0.91) | 0.0014 |         |
| 18-44 years*Wave 5            | 0.81 (0.70, 0.94) | 0.0048 |         |
| Sex*Wave                      |                   |        | 0.0035  |
| Male*Wave 2                   | 1.01 (0.85, 1.21) | 0.8889 |         |
| Male*Wave 3                   | 1.08 (0.91, 1.27) | 0.3962 |         |
| Male*Wave 4                   | 1.01 (0.86, 1.20) | 0.8664 |         |
| Male*Wave 5                   | 0.96 (0.82, 1.13) | 0.6544 |         |
| Race/ethnicity *Wave          |                   |        | <0.0001 |
| Asian Pacific Islander*Wave 2 | 1.19 (0.88, 1.61) | 0.2553 |         |
| Asian Pacific Islander*Wave 3 | 1.59 (1.19, 2.13) | 0.0015 |         |
| Asian Pacific Islander*Wave 4 | 1.52 (1.14, 2.03) | 0.0043 |         |
| Asian Pacific Islander*Wave 5 | 1.50 (1.13, 2.00) | 0.0051 |         |
| Black*Wave 2                  | 0.83 (0.61, 1.12) | 0.2298 |         |
| Black*Wave 3                  | 0.71 (0.53, 0.95) | 0.0196 |         |
| Black*Wave 4                  | 0.72 (0.54, 0.97) | 0.0280 |         |
| Black*Wave 5                  | 0.80 (0.60, 1.07) | 0.1287 |         |
| Other*Wave 2                  | 0.72 (0.61, 0.85) | 0.0001 |         |
| Other*Wave 3                  | 0.61 (0.52, 0.72) | <.0001 |         |
| Other*Wave 4                  | 0.62 (0.53, 0.73) | <.0001 |         |
| Other*Wave 5                  | 0.64 (0.55, 0.75) | <.0001 |         |
| Unknown*Wave 2                | 0.76 (0.63, 0.92) | 0.0060 |         |
| Unknown*Wave 3                | 0.73 (0.60, 0.88) | 0.0014 |         |
| Unknown*Wave 4                | 0.83 (0.68, 1.02) | 0.0746 |         |
| Unknown*Wave 5                | 0.87 (0.73, 1.03) | 0.1146 |         |
| Insured*Wave                  |                   |        | 0.1064  |
| Public*Wave 2                 | 0.87 (0.75, 1.01) | 0.0731 |         |
| Public*Wave 3                 | 0.83 (0.72, 0.96) | 0.0123 |         |
| Public*Wave 4                 | 0.89 (0.78, 1.03) | 0.1246 |         |
| Public*Wave 5                 | 0.89 (0.78, 1.03) | 0.1181 |         |

|              |                   |        |  |
|--------------|-------------------|--------|--|
| Other*Wave 2 | 1.07 (0.83, 1.38) | 0.6171 |  |
| Other*Wave 3 | 1.04 (0.82, 1.33) | 0.7378 |  |
| Other*Wave 4 | 1.03 (0.81, 1.31) | 0.8154 |  |
| Other*Wave 5 | 1.05 (0.83, 1.33) | 0.6662 |  |

**Supplementary Table 12. Multivariable Poisson regression of spike protein seropositivity among the vaccinated in a SARS-CoV-2 serosurveillance system, New York City (N=8,897).**

|                        | Wave 2<br>(January 11<br>through 20<br>June 2021) | Wave 3 (through<br>31 Oct 2021) | Wave 4 (through 6<br>March 2022) | Wave 5 (through 18<br>July 2022) |
|------------------------|---------------------------------------------------|---------------------------------|----------------------------------|----------------------------------|
|                        | PR (95% CI)                                       | PR (95% CI)                     | PR (95% CI)                      | PR (95% CI)                      |
| Age                    |                                                   |                                 |                                  |                                  |
| 18-44 years            | <b>1.18 (1.11, 1.25)</b>                          | <b>1.13 (1.08, 1.17)</b>        | <b>1.06 (1.02, 1.11)</b>         | <b>1.07 (1.03, 1.10)</b>         |
| 45-64 years            | 1.04 (0.98, 1.10)                                 | 1.01 (0.97, 1.06)               | 1.02 (0.97, 1.06)                | <b>1.04 (1.00, 1.08)</b>         |
| 65+ years              | ref                                               | ref                             | ref                              | ref                              |
| Sex                    |                                                   |                                 |                                  |                                  |
| Female                 | ref                                               | ref                             | ref                              | ref                              |
| Male                   | 1.00 (0.95, 1.05)                                 | <b>1.04 (1.00, 1.08)</b>        | 1.03 (0.99, 1.07)                | <b>0.95 (0.92, 0.98)</b>         |
| Race/ethnicity         |                                                   |                                 |                                  |                                  |
| Asian Pacific Islander | 1.03 (0.96, 1.11)                                 | 1.03 (0.98, 1.07)               | 0.97 (0.93, 1.03)                | 1.00 (0.96, 1.04)                |
| Black                  | 1.06 (0.97, 1.16)                                 | 1.00 (0.95, 1.05)               | 1.00 (0.96, 1.05)                | 0.98 (0.94, 1.01)                |
| white                  | ref                                               | ref                             | ref                              | ref                              |
| Other                  | 1.05 (1.00, 1.11)                                 | 1.00 (0.97, 1.04)               | 1.00 (0.96, 1.03)                | 1.00 (0.97, 1.03)                |
| Unknown                | 1.03 (0.95, 1.11)                                 | 1.05 (0.99, 1.11)               | 1.01 (0.90, 1.13)                | 0.93 (0.82, 1.05)                |
| Insured                |                                                   |                                 |                                  |                                  |
| Private                | ref                                               | ref                             | ref                              | ref                              |
| Public                 | 0.97 (0.92, 1.02)                                 | 0.98 (0.94, 1.01)               | 0.98 (0.95, 1.01)                | 1.01 (0.98, 1.04)                |
| Other                  | 0.98 (0.89, 1.07)                                 | 1.02 (0.96, 1.08)               | 1.01 (0.96, 1.06)                | 1.01 (0.97, 1.05)                |

Note: Full list of *p*-values in Supplementary Table 13.

**Supplementary Table 13. Full parameter estimates from a multivariable Poisson regression of spike protein seropositivity among the vaccinated in a SARS-CoV-2 serosurveillance system, New York City (N=8,897).**

|                               | PR (95% CI)       | P-value for parameter estimate (two-tailed Z test) | P-value for likelihood ratio test (two-tailed chi-square test) |
|-------------------------------|-------------------|----------------------------------------------------|----------------------------------------------------------------|
| Wave                          |                   |                                                    | <0.0001                                                        |
| Wave 2 (through 20 June 2021) | ref               |                                                    |                                                                |
| Wave 3 (through 31 Oct 2021)  | 1.13 (1.05, 1.22) | 0.0020                                             |                                                                |
| Wave 4 (through 6 March 2022) | 1.22 (1.13, 1.33) | <.0001                                             |                                                                |
| Wave 5 (through 18 July 2022) | 1.27 (1.18, 1.36) | <.0001                                             |                                                                |
| Age                           |                   |                                                    | <0.0001                                                        |
| 18-44 years                   | 1.18 (1.11, 1.25) | <.0001                                             |                                                                |
| 45-64 years                   | 1.04 (0.98, 1.10) | 0.2146                                             |                                                                |
| 65+ years                     | ref               |                                                    |                                                                |
| Sex                           |                   |                                                    | 0.9748                                                         |
| Female                        | ref               |                                                    |                                                                |
| Male                          | 1.00 (0.95, 1.05) | 0.9748                                             |                                                                |
| Race/ethnicity                |                   |                                                    | 0.4095                                                         |
| Asian Pacific Islander        | 1.03 (0.96, 1.11) | 0.4177                                             |                                                                |
| Black                         | 1.06 (0.97, 1.16) | 0.2233                                             |                                                                |
| white                         | ref               |                                                    |                                                                |
| Other                         | 1.05 (1.00, 1.11) | 0.0694                                             |                                                                |
| Unknown                       | 1.03 (0.95, 1.11) | 0.5333                                             |                                                                |
| Insured                       |                   |                                                    | 0.4527                                                         |
| Private                       | ref               |                                                    |                                                                |
| Public                        | 0.97 (0.92, 1.02) | 0.2140                                             |                                                                |
| Other                         | 0.98 (0.89, 1.07) | 0.6099                                             |                                                                |
| Age*Wave                      |                   |                                                    | 0.0008                                                         |
| 18-44 years*Wave 3            | 0.96 (0.89, 1.03) | 0.2380                                             |                                                                |

|                               |                   |        |        |
|-------------------------------|-------------------|--------|--------|
| 18-44 years*Wave 4            | 0.90 (0.84, 0.97) | 0.0076 |        |
| 18-44 years*Wave 5            | 0.91 (0.84, 0.97) | 0.0057 |        |
| 45-64 years*Wave 3            | 0.97 (0.90, 1.05) | 0.4715 |        |
| 45-64 years*Wave 4            | 0.98 (0.91, 1.06) | 0.5772 |        |
| 45-64 years*Wave 5            | 1.00 (0.93, 1.08) | 0.9165 |        |
| Sex*Wave                      |                   |        | 0.0002 |
| Male*Wave 3                   | 1.04 (0.98, 1.10) | 0.2244 |        |
| Male*Wave 4                   | 1.03 (0.97, 1.10) | 0.3314 |        |
| Male*Wave 5                   | 0.95 (0.90, 1.01) | 0.0780 |        |
| Race/ethnicity *Wave          |                   |        | 0.5875 |
| Asian Pacific Islander*Wave 3 | 1.00 (0.92, 1.08) | 0.9138 |        |
| Asian Pacific Islander*Wave 4 | 0.95 (0.87, 1.03) | 0.2146 |        |
| Asian Pacific Islander*Wave 5 | 0.97 (0.90, 1.05) | 0.4712 |        |
| Black*Wave 3                  | 0.95 (0.85, 1.05) | 0.2968 |        |
| Black*Wave 4                  | 0.95 (0.86, 1.05) | 0.3010 |        |
| Black*Wave 5                  | 0.92 (0.84, 1.02) | 0.1113 |        |
| Other*Wave 3                  | 0.96 (0.89, 1.02) | 0.1749 |        |
| Other*Wave 4                  | 0.95 (0.89, 1.01) | 0.0998 |        |
| Other*Wave 5                  | 0.95 (0.90, 1.01) | 0.1200 |        |
| Unknown*Wave 3                | 1.02 (0.92, 1.13) | 0.6940 |        |
| Unknown*Wave 4                | 0.98 (0.85, 1.13) | 0.8106 |        |
| Unknown*Wave 5                | 0.90 (0.78, 1.05) | 0.1738 |        |
| Insured*Wave                  |                   |        | 0.6485 |
| Public*Wave 3                 | 1.01 (0.95, 1.08) | 0.7424 |        |
| Public*Wave 4                 | 1.01 (0.95, 1.08) | 0.6575 |        |
| Public*Wave 5                 | 1.04 (0.98, 1.11) | 0.1586 |        |
| Other*Wave 3                  | 1.04 (0.94, 1.16) | 0.4483 |        |
| Other*Wave 4                  | 1.03 (0.93, 1.15) | 0.5521 |        |
| Other*Wave 5                  | 1.03 (0.94, 1.14) | 0.5090 |        |

**Supplementary Table 14: Point estimates shown within Figure 3.** Mean values with bootstrapped confidence intervals are presented for antibody prevalence described in Figure 3A. Geometric mean values and bootstrapped 95% confidence intervals for endpoint titer described in Figure 3B.

| Data Range                                                      | Measurement   | Vaccination status | Mean value | Confidence interval |
|-----------------------------------------------------------------|---------------|--------------------|------------|---------------------|
| July 6 <sup>th</sup> - July 20 <sup>th</sup> , 2020 (n=661)     |               |                    |            |                     |
| Antibody prevalence                                             | Nucleoprotein | Vaccinated         | N/A        | N/A                 |
|                                                                 |               | Unvaccinated       | 18.61%     | (15.58%, 21.34%)    |
|                                                                 | Spike         | Vaccinated         | N/A        | N/A                 |
|                                                                 |               | Unvaccinated       | 22.39%     | (20.04%, 24.93%)    |
| Endpoint titer                                                  | Nucleoprotein | Vaccinated         | N/A        | N/A                 |
|                                                                 |               | Unvaccinated       |            | (39.25, 47.8)       |
|                                                                 | Spike         | Vaccinated         | N/A        | N/A                 |
|                                                                 |               | Unvaccinated       |            | (74.92, 88.19)      |
| February 15 <sup>th</sup> - March 1 <sup>st</sup> , 2021(n=497) |               |                    |            |                     |
| Antibody prevalence                                             | Nucleoprotein | Vaccinated         | 15.09%     | (5.66%, 26.42%)     |
|                                                                 |               | Unvaccinated       | 23.20%     | (19.59%, 27.25%)    |
|                                                                 | Spike         | Vaccinated         | 51.58%     | (42.11%, 62.11%)    |
|                                                                 |               | Unvaccinated       | 30.64%     | (27.09%, 33.93%)    |
| Endpoint titer                                                  | Nucleoprotein | Vaccinated         | 36.06      | (27.76, 48.71)      |
|                                                                 |               | Unvaccinated       | 47.2       | (42.24, 54.23)      |
|                                                                 | Spike         | Vaccinated         | 383.8      | (232.27, 650.13)    |
|                                                                 |               | Unvaccinated       | 95.21      | (85.51, 104.71)     |
| June 1 <sup>st</sup> - June 14 <sup>th</sup> , 2021(n=610)      |               |                    |            |                     |
| Antibody prevalence                                             | Nucleoprotein | Vaccinated         | 56.73%     | (51.26%, 62.55%)    |
|                                                                 |               | Unvaccinated       | 58.51%     | (53.13%, 63.89%)    |
|                                                                 | Spike         | Vaccinated         | 86.62%     | (83.73%, 89.33%)    |
|                                                                 |               | Unvaccinated       | 63.08%     | (59.49%, 66.66%)    |
| Endpoint titer                                                  | Nucleoprotein | Vaccinated         | 66.97      | (58.75, 77.32)      |
|                                                                 |               | Unvaccinated       | 81.3       | (70.93, 93.41)      |
|                                                                 | Spike         | Vaccinated         | 1390.59    | (1172.2, 1651.96)   |
|                                                                 |               | Unvaccinated       | 292.82     | (254.1, 341.19)     |
| August 16 <sup>th</sup> – August 30 <sup>th</sup> , 2021(n=758) |               |                    |            |                     |
| Antibody prevalence                                             | Nucleoprotein | Vaccinated         | 54.57%     | (50%, 59.38)        |
|                                                                 |               | Unvaccinated       | 53.51%     | (47.95%, 58.77%)    |
|                                                                 | Spike         | Vaccinated         | 86.06%     | (83.38%, 88.59%)    |



|                                                            |               |              |          |                      |
|------------------------------------------------------------|---------------|--------------|----------|----------------------|
|                                                            |               | Unvaccinated | 62.09%   | (57.84%, 65.69%)     |
| Endpoint titer                                             | Nucleoprotein | Vaccinated   | 72.14    | (64.52, 81.21)       |
|                                                            |               | Unvaccinated | 67.62    | (60.12, 75.86)       |
|                                                            | Spike         | Vaccinated   | 1059.25  | (922.57, 1221.8)     |
|                                                            |               | Unvaccinated | 284.45   | (243.78, 331.13)     |
| May 23 <sup>rd</sup> - May 30 <sup>th</sup> , 2022 (n=592) |               |              |          |                      |
| Antibody prevalence                                        | Nucleoprotein | Vaccinated   | 44.82%   | (39.90%, 49.75%)     |
|                                                            |               | Unvaccinated | 52.69%   | (45.70%, 59.69%)     |
|                                                            | Spike         | Vaccinated   | 95.81%   | (93.60%, 97.54%)     |
|                                                            |               | Unvaccinated | 92.47%   | (88.71%, 96.24%)     |
| Endpoint titer                                             | Nucleoprotein | Vaccinated   | 57.41    | (50.94, 65.15)       |
|                                                            |               | Unvaccinated | 78.49    | (64.65, 98.15)       |
|                                                            | Spike         | Vaccinated   | 14213.47 | (11641.26, 16974.62) |
|                                                            |               | Unvaccinated | 6007.59  | (4415.7, 8165.82)    |
| Aug 21 <sup>st</sup> – Oct 2 <sup>nd</sup> , 2023 (n=595)  |               |              |          |                      |
| Antibody prevalence                                        | Nucleoprotein | Vaccinated   | 35.12%   | (30.51%, 59.49%)     |
|                                                            |               | Unvaccinated | 50.97%   | (43.69%, 58.25%)     |
|                                                            | Spike         | Vaccinated   | 97.97%   | (96.45%, 99.23%)     |
|                                                            |               | Unvaccinated | 96.11%   | (93.68%, 98.54%)     |
| Endpoint titer                                             | Nucleoprotein | Vaccinated   | 59.37    | (52.32, 68.19)       |
|                                                            |               | Unvaccinated | 77.7     | (65.49, 91.96)       |
|                                                            | Spike         | Vaccinated   | N/A      | N/A                  |
|                                                            |               | Unvaccinated | N/A      | N/A                  |

**Supplementary Table 15: Full expanded P-values show within Figure 3.** Comparisons labeled as Chi-squared are shown within Figure 3a while all T tests correspond to Figure 3b. All comparisons are between nucleoprotein and spike values shown within the graph.

| Date range                                                           | Grouping     | Test        | P-value                |
|----------------------------------------------------------------------|--------------|-------------|------------------------|
| <b>July 6<sup>TH</sup> - July 20<sup>TH</sup>, 2020 (N=661)</b>      | Vaccinated   | Chi-squared | N/A                    |
|                                                                      |              | T-test      | N/A                    |
|                                                                      | Unvaccinated | Chi-squared | 0.0773                 |
|                                                                      |              | T-test      | 1.89x10 <sup>-19</sup> |
| <b>February 15<sup>TH</sup> - March 1<sup>ST</sup>, 2021 (N=497)</b> | Vaccinated   | Chi-squared | 0.0004                 |
|                                                                      |              | T-test      | 1.99x10 <sup>-09</sup> |

|                                                                      |              |             |                         |
|----------------------------------------------------------------------|--------------|-------------|-------------------------|
|                                                                      | Unvaccinated | Chi-squared | 0.0054                  |
|                                                                      |              | T-test      | $1.71 \times 10^{-15}$  |
| <b>June 1<sup>ST</sup> - June 14<sup>TH</sup>, 2021 (N=610)</b>      |              |             |                         |
|                                                                      | Vaccinated   | Chi-squared | $2.09 \times 10^{-11}$  |
|                                                                      |              | T-test      | $1.44 \times 10^{-89}$  |
|                                                                      | Unvaccinated | Chi-squared | 0.2680                  |
|                                                                      |              | T-test      | $1.67 \times 10^{-25}$  |
| <b>August 16<sup>TH</sup> – August 30<sup>TH</sup>, 2021 (N=758)</b> |              |             |                         |
|                                                                      | Vaccinated   | Chi-squared | $2.63 \times 10^{-25}$  |
|                                                                      |              | T-test      | $8.23 \times 10^{-111}$ |
|                                                                      | Unvaccinated | Chi-squared | $6.33 \times 10^{-05}$  |
|                                                                      |              | T-test      | $4.19 \times 10^{-34}$  |
| <b>May 23<sup>RD</sup> - May 30<sup>TH</sup>, 2022 (N=592)</b>       |              |             |                         |
|                                                                      | Vaccinated   | Chi-squared | $2.12 \times 10^{-56}$  |
|                                                                      |              | T-test      | $3.07 \times 10^{-246}$ |
|                                                                      | Unvaccinated | Chi-squared | $2.17 \times 10^{-17}$  |
|                                                                      |              | T-test      | $2.27 \times 10^{-74}$  |
| <b>August 21<sup>ST</sup> – October 2<sup>ND</sup>, 2023 (N=595)</b> |              |             |                         |
|                                                                      | Vaccinated   | Chi-squared | $3.66 \times 10^{-76}$  |
|                                                                      |              | T-test      | $4.04 \times 10^{-252}$ |
|                                                                      | Unvaccinated | Chi-squared | $9.09 \times 10^{-25}$  |
|                                                                      |              | T-test      | $6.19 \times 10^{-101}$ |
